1 **Title: Interaction of the *Xanthomonas* effectors XopQ and XopX results in induction of**  
2 **rice immune responses**

3

4 **Running head: XopQ and XopX in immune response modulation**

5

6 **Authors:**

7 Sohini Deb<sup>1</sup>, Palash Ghosh<sup>1</sup>, Hitendra K. Patel<sup>1</sup>, Ramesh V. Sonti<sup>1,2\*</sup>

8 **Affiliation:**

9 <sup>1</sup>CSIR- Centre for Cellular and Molecular Biology (CSIR-CCMB), Hyderabad, India-  
10 500007.

11 <sup>2</sup>National Institute of Plant Genome Research, New Delhi, India- 110067.

12 \*Corresponding author

13 **Contact Details:**

14 Ramesh V. Sonti: [sonti@ccmb.res.in](mailto:sonti@ccmb.res.in), [sonti@nipgr.ac.in](mailto:sonti@nipgr.ac.in), Phone No.: +91- 11-26742267

15 (RVS)

16 **Word count:**

17 7652 words including Title, Summary, Introduction, Results, Discussion, Experimental  
18 procedures and Figure legends

19

20 **Keywords:** *Xanthomonas oryzae* pv. *oryzae*, 14-3-3 protein, XopX, XopQ, resistance, rice,  
21 effector

22

23 **Summary**

24 *Xanthomonas oryzae* pv. *oryzae* uses several type III secretion system (T3SS) effectors,  
25 namely XopN, XopQ, XopX, and XopZ, to suppress rice immune responses that are induced  
26 following treatment with cell wall degrading enzymes. Here we show that the T3SS secreted  
27 effector XopX interacts with two of the eight rice 14-3-3 proteins. Mutants of XopX that are  
28 defective in 14-3-3 binding are also defective in suppression of immune responses,  
29 suggesting that interaction with 14-3-3 proteins is required for suppression of host innate  
30 immunity. However, *Agrobacterium* mediated delivery of both XopX and XopQ into rice  
31 cells results in induction of rice immune responses. These immune responses are not  
32 observed when either protein is individually delivered into rice cells. XopQ-XopX induced  
33 rice immune responses are not observed in a XopX mutant that is defective in 14-3-3 binding.  
34 Yeast two- hybrid and BiFC assays indicate that XopQ and XopX interact with each other. In  
35 a screen for *Xanthomonas* effectors which can suppress XopQ- XopX induced rice immune  
36 responses, five effectors were identified, namely XopU, XopV, XopP, XopG and AvrBs2,  
37 which were able to do so. These results suggest a complex interplay of *Xanthomonas* T3SS  
38 effectors in suppression of pathogen triggered immunity and effector triggered immunity to  
39 promote virulence on rice.

40

#### 41 **Significance statement:**

42 This work studies the role of the type III effector XopX in the suppression and induction of  
43 rice immune responses, by differential interaction with the 14-3-3 proteins, or with the type  
44 III effector XopQ respectively. We have also identified a subset of type III effectors which  
45 can suppress this form of immune responses.

46

#### 47 **Introduction**

48 Plants are subject to attack by various pathogenic organisms. To combat these pathogens,  
49 plants have evolved an immune system that is inducible and multi-layered. The first line of  
50 defence arises from the recognition of signature patterns on the pathogen, known as pattern -  
51 associated molecular patterns (PAMPs) through specific pattern recognition receptors (PRRs)  
52 at the plant cell surface (Saijo et al., 2018). This leads to activation of PAMP-triggered  
53 immunity (PTI), which is characterised by production of reactive oxygen species (ROS),  
54 callose deposition and expression of defence-related genes (Jones and Dangl, 2006).  
55 Successful pathogens suppress this immune response with the help of effectors, which in  
56 Gram-negative bacteria are primarily secreted through their type III secretion system. For  
57 this, they target specific plant proteins involved in the immune response cascade (White and  
58 Yang, 2009). For example, the *Xanthomonas oryzae* pv. *oryzae* effector XopQ interacts with  
59 the rice 14-3-3 proteins to suppress immune responses (Deb et al., 2019). The AvrPto effector  
60 has also been shown to interact with the plant receptor FLS2, which recognizes the bacterial  
61 flagellin, further suppressing host PTI (Xiang et al., 2008). The XopJ effector of  
62 *Xanthomonas campestris* mediates inhibition of the proteasome to interfere with SA-  
63 dependent defence response (Üstün et al., 2013). The second layer of plant defence involves  
64 recognition of these effectors by the plant, via specific disease resistance genes (R genes),  
65 which are usually nucleotide-binding leucine-rich repeat (NB-LRR) proteins, leading to  
66 effector-triggered immunity (ETI) (Chisholm et al., 2006). ETI generally leads to a strong  
67 defence reaction called the hypersensitive response (HR), characterized by rapid cell death  
68 and local necrosis, which prevents further spread of pathogen (Oh and Martin, 2011).

69 The type III effectors *Xanthomonas* outer protein Q (XopQ) and XopX of *X. oryzae* pv.  
70 *oryzae* had been identified as two out of four type III effectors which could suppress the  
71 innate immune responses induced by treatment of a cell-wall degrading enzyme in rice  
72 (Sinha et al., 2013). The XopQ protein is highly conserved in *Xanthomonads* (Hajri et al.,

73 2009, Moreira et al., 2010, Jalan et al., 2013, Potnis et al., 2011), and has been shown to  
74 require its biochemical activity for complete virulence in rice (Gupta et al., 2015). XopQ also  
75 has motifs for binding to 14-3-3 proteins (Dubrow et al., 2018, Deb et al., 2019). The 14-3-3  
76 proteins are eukaryotic adapter proteins which play key roles in multiple cellular events in  
77 plants (Cotelle and Leonhardt, 2015, Cotelle et al., 2000). Rice has genes encoding for eight  
78 14-3-3 isoforms, named as *gf14a*, *gf14b*, *gf14c*, *gf14d*, *gf14e*, *gf14f*, *gf14g* and *gf14h* (Chen et  
79 al., 2006).

80 A number of studies have shown the role of the 14-3-3 proteins in modulation of PTI and ETI  
81 (Lozano-Duran and Robatzek, 2015), by the binding of host 14-3-3 proteins with the type III  
82 effectors of the pathogen (Dubrow et al., 2018). The ability of *X. oryzae pv. oryzae* XopQ  
83 protein to interact with 14-3-3 proteins has been shown to be important for its ability to  
84 suppress rice immune responses (Deb et al., 2019). The *X. campestris pv. vesicatoria* XopQ  
85 has been shown to suppress effector triggered immunity (ETI)- associated cell death in  
86 pepper by interacting with the 14-3-3 protein TFT4 (Teper et al., 2014), and also suppresses  
87 cell death triggered by MAPKKK $\alpha$  (Teper et al., 2015). In two different studies,  
88 phosphorylation of the *Pseudomonas* ortholog, HopQ1, has been shown to enable binding of  
89 host 14-3-3 proteins, and has been shown to interact with the tomato 14-3-3 proteins TFT1  
90 and TFT5 in a phosphorylation-dependent manner (Li et al., 2013, Giska et al., 2013). On the  
91 other hand, the *X. campestris pv. vesicatoria* XopX protein has been shown to contribute to  
92 virulence in pepper and tomato, and modulates the plant immune response, resulting in  
93 enhanced susceptibility of the plant (Metz et al., 2005). However, XopX also seems to be an  
94 inducer of rice immune responses wherein it was shown to weakly upregulate PTI marker  
95 genes (Stork et al., 2015). The *X. oryzae pv. oryzae* XopX protein has five putative 14-3-3  
96 protein binding motifs.

97 In this study, we show that the *X. oryzae* pv. *oryzae* XopX protein interacts with rice 14-3-3  
98 proteins and that this interaction is necessary for its ability to suppress rice immune  
99 responses. We also demonstrate that XopX interacts with XopQ. This interaction results in  
100 induction of rice immune responses in a 14-3-3 dependent manner. We show that several  
101 other *X. oryzae* pv. *oryzae* type III effectors such as XopU, XopV, XopP, XopG and AvrBs2  
102 are able to suppress rice immune responses that are induced by XopQ-XopX. Overall, the  
103 results suggest that XopX can interact with a subset of rice 14-3-3 proteins as well as with the  
104 XopQ effector, and that this differential interaction leads to suppression or induction of  
105 immune responses respectively. Also, additional type III effectors of *X. oryzae* pv. *oryzae*  
106 may be involved in suppression of XopQ- XopX induced immune responses in rice.

107

## 108 **Results:**

### 109 **XopX interacts with two of the eight rice 14-3-3 proteins**

110 Bioinformatic analysis revealed that *X. oryzae* pv. *oryzae* XopX has five putative 14-3-3  
111 protein binding motifs encompassing the conserved residues serine- 84 (mode- II motif  
112 ‘RASTSAP’; amino acid 80- 86), serine- 193 (mode- II motif ‘RGAISNP’; amino acid 189-  
113 195), threonine- 430 (mode- II motif ‘RRDFTGP’; amino acid 426- 432), serine- 477 (mode-  
114 I motif ‘RSESIP’; amino acid 474- 479) and threonine- 621 (mode- I motif ‘RLFTGP’;  
115 amino acid 618- 623). In order to check if XopX would interact with any of the rice 14-3-3  
116 proteins, we cloned the wild-type *xopX* gene in the pDEST32 vector yielding the *BD::xopX*  
117 (DNA-Binding Domain) clone (as listed in Supplementary table S2). We screened *xopX*  
118 against the eight rice 14-3-3 proteins cloned in the pDEST22 vector yielding the *AD::gf14a-h*  
119 (Activation Domain) clones used in an earlier study (Deb et al., 2019) (listed in  
120 Supplementary table S2), using the yeast two- hybrid system and the yeast strain pJ694a

121 (James et al., 1996). The one-to-one yeast two- hybrid screen indicated that the XopX  
122 protein showed physical interaction with two of the eight rice 14-3-3 proteins, Gf14d and  
123 Gf14e (Fig 1A). Growth of yeast on plates lacking leucine and tryptophan confirmed the  
124 presence of pDEST32::*xopX* as well as pDEST22::*gf14a-h* in the yeast strain. However,  
125 growth on plates lacking adenine, histidine, leucine and tryptophan, and supplemented with  
126 3-amino-1,2,4-triazole (3-AT), indicated a positive interaction of XopX- Gf14d and XopX-  
127 Gf14e. We further tested this in a bimolecular fluorescence complementation (BiFC) assay,  
128 wherein *xopX* was cloned with the C- terminal of Venus fluorescent protein (VFP) yielding  
129 *cVFP::xopX* and *gf14d* and *gf14e* were cloned with the N- terminal of VFP yielding  
130 *nVFP::gf14d* and *nVFP::gf14e* (as listed in Supplementary table S2). Infiltration of  
131 *Agrobacterium tumefaciens* AGL1 harbouring *cVFP::xopX* and either *nVFP::gf14d* or  
132 *nVFP::gf14e* (as listed in Supplementary table S3) in *Nicotiana benthamiana* leaf epidermis  
133 revealed strong complementation of fluorescence for both Gf14d and Gf14e with XopX (Fig  
134 1B).

135 **Mutation in the serine- 193 and serine- 477 containing 14-3-3 protein binding motifs of**  
136 **XopX abolishes its ability to interact with the rice 14-3-3 proteins**

137 Since XopX showed interaction with rice 14-3-3 proteins, we further asked which of its 14-3-  
138 3 protein binding motifs was responsible for this interaction. In order to study this aspect,  
139 since 14-3-3 proteins are known to bind to client proteins in a phosphorylation- dependent  
140 manner, we individually mutated the conserved serine/ threonine residues in the five 14-3-3  
141 protein binding motifs of XopX to alanine by site- directed mutagenesis. This yielded the  
142 phospho- null pENTR/D-TOPO constructs containing *xopX S84A*, *xopX S193A*, *xopX T430A*,  
143 *xopX S477A* and *xopX T621A*. These were then cloned into the yeast two- hybrid vector  
144 pDEST32 (Invitrogen) by Gateway® cloning (Invitrogen), yielding the clones *BD::xopX*  
145 *S84A*, *BD::xopX S193A*, *BD::xopX T430A*, *BD::xopX S477A* and *BD::xopX T621A* (as listed

146 in Supplementary table S2). These clones were further screened for interaction with  
147 pDEST22::*gf14d* and pDEST22::*gf14e* using the yeast two- hybrid system. It was observed  
148 that mutation of serine to alanine, individually, in motif-2 (*xopX S193A*) and motif-4 (*xopX*  
149 *S477A*), affected the ability of the XopX protein to interact with Gf14d as well as with Gf14e.  
150 When grown on selection plates for interaction, motif-2 XopX S193A was seen to lose  
151 interaction with both Gf14d and Gf14e (Fig 2A & B). However, motif-4 XopX S477A loses  
152 interaction with Gf14e but retains its ability to interact with Gf14d weakly (Fig 2A & B).  
153 However, *in-planta*, both the mutants XopX S193A and XopX S477A seem to lose  
154 interaction with both Gf14d (Fig 2C) and Gf14e (Fig 2D). The mutants in the other three 14-  
155 3-3 protein binding motifs, XopX S84A, XopX T430A and XopX T621A, seem to interact  
156 with both Gf14d and Gf14e as efficiently as wild- type XopX (Fig 2A & B). To further  
157 confirm this, phosphomimic mutants were made of the two motifs containing serine- 193 and  
158 serine- 477, yielding the XopX S193D and XopX S477D mutant proteins. XopX S193D as  
159 well as XopX S477D were seen to interact with both Gf14d and Gf14e, in yeast (Fig 2A & B)  
160 and *in- planta* (Fig 2C & D). Hence it appears that XopX requires phosphorylation of both  
161 motif-2 containing serine-193 and motif-4 containing serine-477 for interaction with Gf14d  
162 and Gf14e.

163 **Mutations in the serine- 193 and serine- 477 containing 14-3-3 protein binding motifs of**  
164 **XopX abolishes the ability of the protein to suppress rice immune responses**

165 In order to understand the functional role of the interaction of XopX with Gf14d and Gf14e,  
166 we went ahead to study the role of XopX in the suppression of the rice immune responses.  
167 Earlier work in the lab showed that XopX, along with XopQ, XopN and XopZ, is important  
168 for the suppression of cell- wall degrading enzyme (CWDE) induced immune responses of  
169 rice (Sinha et al., 2013). Since XopX was seen to be binding to the rice 14-3-3 proteins, the  
170 effect of mutations in the five 14-3-3 protein binding motifs of XopX on the ability to

171 suppress the rice immune responses was assessed. For this purpose, we took advantage of the  
172 observation that a quadruple mutant (QM) strain (Sinha et al., 2013), which is deficient in the  
173 production of the XopQ, XopX, XopN and XopZ proteins, induces defence response  
174 associated callose deposition and programmed cell death (PCD). Assaying for the PCD  
175 indicated that XopX wild- type was able to suppress PCD induced by the QM strain, as  
176 signified by internalization of the propidium iodide (PI) stain, whereas mutation to alanine in  
177 two of the five 14-3-3 protein binding motifs of *xopX*, motif-2 (*xopX S193A*) and motif-4  
178 (*xopX S477A*), affected the ability of the XopX protein to suppress PCD induced by QM (Fig  
179 3A). However, the phosphomimic mutants *xopX S193D* and *xopX S477D* suppressed PCD  
180 induced by the QM (Fig 3A). Similar results were obtained in callose deposition assays in  
181 which pHM1::*xopX*, pHM1::*xopX S84A*, pHM1::*xopX S193A*, pHM1::*xopX S193D*,  
182 pHM1::*xopX T430A*, pHM1::*xopX S477A*, pHM1::*xopX S477D* or pHM1::*xopX T621A* were  
183 overexpressed in the QM background. Here, XopX was seen to be able to suppress callose  
184 deposition induced by the QM, whereas, XopX S193A as well as XopX S477A were found to  
185 be deficient in the suppression of callose deposition induced by the QM (Fig 3B & C).  
186 However, both XopX S193D as well as XopX S477D could suppress callose deposition (Fig  
187 3B & C). XopX S84A, XopX T430A and XopX T621A could suppress both callose  
188 deposition as well as PCD induced by the QM, as efficiently as wild type XopX, indicating  
189 that these motifs are probably not important for suppression of rice immune responses by  
190 XopX (Fig 3A- C).

191 **Mutation in the serine- 193 and serine- 477 containing 14-3-3 protein binding motifs of**  
192 **XopX abolishes its ability to localise to the nucleus**

193 Since 14-3-3 proteins are known to alter the subcellular localization of their client proteins,  
194 we further checked the subcellular localization of the XopX protein and its 14-3-3 protein  
195 binding mutants XopX S193A, XopX S193D, XopX S477A and XopX S477D by tagging



196 them with the eGFP protein and transient overexpression in onion epidermal cells through *A.*  
197 *tumefaciens* AGL1. Visualisation for fluorescence 48h after infection with *A. tumefaciens*  
198 expressing the respective eGFP tagged XopX protein or its 14-3-3 protein binding mutants  
199 revealed that the XopX wild- type protein localises mostly to the nucleus, but also to the  
200 peripheral cytoplasm (Fig 4). However, the 14-3-3 protein binding mutants of XopX which  
201 were deficient in 14-3-3 protein binding and immune response suppression (XopX S193A  
202 and XopX S477A) were found to be unable to localise to the nucleus, and were seen  
203 exclusively in the cytoplasm (Fig 4). The phosphomimic mutants XopX S193D and XopX  
204 S477D exhibited a nucleo- cytoplasmic localisation that is similar to wild type XopX (Fig 4).

### 205 **XopX interacts with XopQ**

206 The XopX protein was found to suppress cell wall degrading enzyme induced immune  
207 responses along with the XopN, XopQ and XopZ effector proteins (Sinha et al., 2013).  
208 Therefore, we also assessed the ability of the XopX protein to interact with the XopN, XopQ  
209 or XopZ proteins using the yeast two- hybrid system. The Activation- domain (AD) fusion  
210 clones of *xopQ*, *xopN* and *xopZ* were made by cloning these genes into the pDEST22 vector  
211 yielding *AD::xopQ*, *AD::xopN* and *AD::xopZ* respectively. The *BD::xopX* clone was used for  
212 transformation with *AD::xopQ*, *AD::xopN* and *AD::xopZ* respectively in the yeast strain  
213 pJ694a. Primary transformants were selected on synthetic dropout (SD) -leucine -tryptophan  
214 double dropout yeast plates. Selection for interaction done on synthetic dropout (SD) -  
215 adenine -histidine -leucine -tryptophan quadruple dropout yeast plates supplemented with  
216 1mM 3- AT revealed a positive interaction of XopQ with XopX (Fig 5A). The XopQ- XopX  
217 interaction was further confirmed *in-planta* using the BiFC assay, wherein *xopQ* was tagged  
218 with the N-terminal portion of the VFP yielding *nVFP::xopQ* and *xopX* was tagged with the  
219 C-terminal portion of VFP yielding *cVFP::xopX*. Co-cultivation of onion epidermal peels  
220 with AGL1 strains expressing these two proteins and further checking for fluorescence

221 revealed strong fluorescence in the nucleus, as seen by co-localisation with DAPI, indicating  
222 that the XopX and XopQ proteins interact with each other (Fig 5B). XopQ shows interaction  
223 with all the 14-3-3 protein binding motif mutants of XopX, indicating that interaction of  
224 XopQ- XopX is not 14-3-3 dependent (Supplementary Fig S1).

### 225 **XopQ- XopX co-expression induces rice immune responses**

226 We transiently overexpressed the eGFP::XopQ, eGFP::XopX and eGFP::XopQ-  
227 eGFP::XopX proteins in rice roots through *A. tumefaciens* AGL1. PI staining for the  
228 induction of PCD showed negligible PCD induction after treatment with XopQ and XopX,  
229 marked by internalisation of PI (Fig 6A). However, when XopQ and XopX were co-  
230 expressed, a high degree of PCD marked by PI internalisation was seen (Fig 6A). This  
231 seemed to indicate that co- expression of XopQ and XopX induced PCD in rice roots. A  
232 similar result was observed in a callose deposition assay, wherein co-expression of XopQ-  
233 XopX, but not of the individual proteins, led to a higher number of callose deposits (Fig 6B  
234 & C).

### 235 **Phosphorylation of XopX at serine- 193 and serine- 477 is essential for XopQ- XopX** 236 **induced immune responses**

237 Since the XopX proteins showed interaction with 14-3-3 proteins, we asked if the 14-3-3  
238 proteins would play a role in the induction of immune responses by XopQ- XopX. The effect  
239 of mutations of motif-2, eGFP::XopX S193A, and motif-4, eGFP::XopX S477A, on XopQ-  
240 XopX induced immune responses was assessed. It was observed that overexpression of either  
241 the XopX S193A or the XopX S477A mutants, along with XopQ, failed to induce the PCD  
242 response in rice (Fig 7A). This is in contrast to induction of immune responses in rice by  
243 XopX- XopQ. The phosphomimic mutants XopX S193D and XopX S477D, however,  
244 showed induction of PCD along with XopQ (Fig 7A). Similar results were observed in a

245 callose deposition assay (Fig 7B & C). This indicated that phosphorylation was necessary for  
246 XopQ-XopX induced immune responses.

247 **A unique set of type III effectors can suppress XopQ- XopX mediated immune**  
248 **responses**

249 Since the co- expression of XopQ- XopX induced rice immune responses, we asked if any of  
250 the other type III effectors could suppress this immune response. For this, 19 type III non-  
251 TAL effectors (as listed in Supplementary table S4) were cloned along with the eGFP tag and  
252 transiently overexpressed through *A. tumefaciens* AGL1 in rice roots. XopR, XopT and  
253 XopAA could not be tested due to difficulty in amplification of the genes. We observed that  
254 pre-treatment with 5 of the 19 effectors tested, namely XopU, XopV, XopP, XopG and  
255 AvrBs2, could suppress XopQ- XopX induced PCD. We observed significantly lesser  
256 internalisation of PI stain after XopQ- XopX treatment when rice roots were pre-treated with  
257 these five type III effectors, as opposed to XopQ- XopX treatment alone (Fig 8A). This  
258 indicated that these effectors could successfully suppress the PCD induced by XopQ- XopX  
259 treatment. Overexpression of XopG, XopP, XopU, XopV or AvrBs2 individually did not  
260 induce the PCD response in rice (Fig 8A). Expression of these effectors was also checked in  
261 *N. tabacum* (Supplementary Fig S2). Pre- treatment with the other 14 effectors, XopI, XopK,  
262 XopL, XopAD, HpaA, XopW, XopA, XopL, XopAE, XopC, XopF, XopAB, XopN, XopZ or  
263 XopY were seen to be unable to suppress the PCD induced by overexpression of XopQ-  
264 XopX (Supplementary Fig S3). All 14 of these effectors were found to be expressing, as  
265 visualised in *N. tabacum* (Supplementary Fig S4). This was further confirmed using a callose  
266 deposition assay, wherein similar results were obtained. XopG, XopP, XopU, XopV and  
267 AvrBs2 were found to be able to suppress the callose deposition induced by treatment with  
268 XopQ and XopX (Fig 8 B & C).

269 **Discussion:**

270 This study highlights the dual role of the XopQ- XopX type III effectors in modulation of  
271 immune responses of rice. The *X. oryzae* pv. *oryzae* XopX has earlier been shown to be  
272 important for the suppression of cell- wall degrading enzyme induced immune responses in  
273 rice (Sinha et al., 2013). XopX from *X. campestris* pv. *vesicatoria* also contributes to the  
274 virulence of the bacteria on the host plants, pepper and tomato, and modulates the plant  
275 immune response, resulting in enhanced susceptibility of the plant (Metz et al., 2005).  
276 However, the XopX effector protein from *Xanthomonas campestris* pv. *vesicatoria* (*Xcv*) has  
277 also been shown to be an inducer of rice immune responses wherein it was shown to weakly  
278 upregulate PTI marker genes (Stork et al., 2015). In the current work, we demonstrate that  
279 XopX suppresses rice immune responses, by interaction with the 14-3-3 proteins. XopX  
280 interacts with two rice 14-3-3 proteins, namely Gf14d And Gf14e. Both motif-2  
281 encompassing XopX S193 as well as motif-4 encompassing XopX S477 seem to be required  
282 for the interaction of XopX with the 14-3-3 proteins as XopX loses interaction with both  
283 Gf14d and Gf14e if either motif-2 or motif-4 is mutated to a phospho-null motif. Hence, it  
284 appears that both motifs are required for interaction with Gf14d and Gf14e, which had earlier  
285 been shown to be a negative regulator of rice immune responses. The role of Gf14d in  
286 elaboration of rice immune responses is not yet established. The observation that XopX  
287 mutations that are unable to interact with Gf14d and Gf14e are also unable to suppress rice  
288 immune responses suggests that at least one of these two 14-3-3 proteins might be a positive  
289 regulator of rice immune responses. As Gf14e is shown to be a negative regulator of rice  
290 immune responses, it is possible that Gf14d is a positive regulator of rice immune innate  
291 immunity. However, this needs to be established. The significance of the interaction of XopX  
292 with a negative regulator of innate immunity such as Gf14e is also to be investigated.  
293 Another question which arises is also that, since both XopQ and XopX are suppressors of

294 immune responses, is there a temporal or spatial distribution of XopQ and XopX which  
295 decides the interaction and hence suppression/ induction of immune responses? XopQ is a  
296 highly conserved core effector in both *X. oryzae* pv. *oryzae* as well as *X. oryzae* pv. *oryzicola*  
297 strains (Midha et al., 2017, Hajri et al., 2009). XopQ and XopX both have a nucleo-  
298 cytoplasmic localisation. It has been shown earlier that the mutants of XopQ which were  
299 deficient in 14-3-3 protein binding (XopQ S65A), fails to localise to the cytoplasm. On the  
300 other hand, mutants of XopX which were deficient in 14-3-3 protein binding (XopX S193A  
301 and XopX S477A) fail to localise to the nucleus. Hence, phosphorylation, and interaction  
302 with the cognate 14-3-3 proteins seem to be important for cytoplasmic localisation of XopQ  
303 and nuclear localisation of XopX and this localization might be important for their activity in  
304 suppression of innate immunity. This leads us to hypothesise that this nucleo- cytoplasmic  
305 partitioning may be crucial for suppression of immune responses. The function of  
306 suppression of immune responses might be specifically taking place in the cytoplasm in case  
307 of XopQ and in the nucleus for XopX. However, interaction of XopQ and XopX may  
308 sequester these two proteins, leading to loss of suppression of immune responses. Their  
309 interaction and co-localisation may also be activating downstream pathways for induction of  
310 immune responses (Supplementary Fig S5). There may also be a temporal distribution in  
311 expression of XopQ and XopX, as XopX has been shown to be expressed in early stages of  
312 host infection at 3 and 6 days after infection (Soto-Suarez et al., 2010). Such dual behaviour  
313 of T3SS effectors in suppressing and inducing plant immune responses has also been reported  
314 previously for the *Pseudomonas syringae* pv. *tomato* (*Pst*) effector AvrE1 and for the  
315 *Xanthomonas euvesicatoria* XopX (Badel et al., 2006, Stork et al., 2015).

316 It is a possibility that the XopQ- XopX induced immune responses is a form of defence  
317 response that is triggered by these two effectors. The interaction of XopQ and XopX may be  
318 sensed by the rice plant, which then might be able to mount an effector triggered immune

319 response. In such a scenario, it may be imperative for *X. oryzae* pv. *oryzae* to be able to  
320 suppress this effector triggered defence response. Indeed, we find that five effectors, XopU,  
321 XopV, XopP, XopG and AvrBs2, out of the nineteen non- TAL effectors screened, could  
322 suppress XopQ- XopX induced immune responses. Out of these five effectors, AvrBs2 and  
323 XopV are part of the core effectors in 113 strains of Indian, Asian, African and USA strains  
324 of *X. oryzae* (Midha et al., 2017), and are also common between *X. oryzae* pv. *oryzae* and the  
325 bean pathogen, *X. axonopodis* pv. *phaseoli* (Aritua et al., 2015). XopP, XopU and XopV have  
326 also been shown to be ubiquitously present in *X. oryzae* pv. *oryzae* and *X. oryzae* pv.  
327 *oryzicola* strains (Hajri et al., 2009). AvrBs2 from *X. oryzae* pv. *oryzicola* has earlier been  
328 shown to be an essential virulence factor that contributes to bacterial virulence and  
329 multiplication by inhibiting the rice defence responses (Li et al., 2015) and is highly  
330 conserved among strains of *X. campestris* pv. *vesicatoria*, and other *X. campestris* pathovars  
331 (Kearney and Staskawicz, 1990). The *X. oryzae* pv. *oryzae* XopP protein has been shown to  
332 interact with the U-box domain of an E3 ubiquitin ligase OsPUB44, thereby inhibiting the  
333 E3 ubiquitin ligase activity of OsPUB44 (Ishikawa et al., 2014). Interestingly, preliminary  
334 bioinformatic analysis has revealed that XopU, XopV, XopP, XopG and AvrBs2, all have at  
335 least one putative mode- I 14-3-3 protein binding motif with a conserved serine [XopU:  
336 ‘RAESTP’, amino acid 374- 379; XopV: ‘RIRSTP’, amino acid 142- 147; XopP: ‘RLESLP’,  
337 amino acid 494- 499; XopG: ‘RLG SNP’, amino acid 70- 75; AvrBs2: ‘RAVSIP’, amino acid  
338 46- 51 and ‘RAASGP’, amino acid 143- 148]. Hence, it is possible that these effectors may  
339 suppress XopQ- XopX induced immune responses by interaction with the rice 14-3-3  
340 proteins.

341 Thus, this study suggests a dual role for the type III effectors XopQ and XopX in the course  
342 of disease progression of *X. oryzae* pv. *oryzae* both as suppressor and inducers of immune

343 responses in rice, and identifies bacterial effectors that may be involved in suppression of  
344 effector- triggered immunity.

345 Is there a temporal distribution in expression of XopQ and XopX during progression of  
346 disease caused by *X. oryzae* pv. *oryzae*? What are the roles of the 14-3-3 proteins Gf14d,  
347 Gf14e, Gf14f and Gf14g in elaboration of rice immune responses during *X. oryzae* pv. *oryzae*  
348 infection? What are the additional rice factors which might regulate the localisation of these  
349 proteins and their interaction? These questions, and elucidation of the mechanism and  
350 biological significance of the interaction XopQ and XopX are aspects which require further  
351 research.

352

### 353 **Experimental Procedures:**

#### 354 **Bacterial strains and plant material**

355 The bacterial strains *Escherichia coli* DH5 $\alpha$ ; *Agrobacterium tumefaciens* AGL1, *X. oryzae*  
356 pv. *oryzae* strain BXO43 (Thieme et al., 2005) and the *X. oryzae* pv. *oryzae* mutant  $\Delta xopQ$   
357  $xopN$ -  $\Delta xopX$   $\Delta xopZ$  quadruple mutant (QM) (Sinha et al., 2013) were used for the study. *E.*  
358 *coli* and *A. tumefaciens* AGL1 strain were grown in Luria–Bertani (LB) medium. *E. coli* was  
359 grown at 37°C whereas *A. tumefaciens* was grown at 28°C. *X. oryzae* pv. *oryzae* strains were  
360 grown on peptone sucrose (PS) medium at 28°C (Ray et al., 2000). The yeast strain pJ694a  
361 was grown at 30°C in yeast extract, peptone, dextrose (YPD) medium, or minimal media  
362 supplemented with suitable amino acids for auxotrophic selection. The plant cultivars used  
363 were the susceptible rice variety Taichung Native- 1 (TN-1) for transient overexpression  
364 studies in rice and *Nicotiana benthamiana* or *Nicotiana tabacum* for ectopic overexpression  
365 of proteins for bimolecular fluorescence complementation assay or expression analysis. The  
366 concentrations of antibiotics used were rifampicin (Rif)-50 $\mu$ g/ml, spectinomycin (Sp)-

367 50µg/ml, gentamycin (Gent)- 10µg/ml, ampicillin (Amp)- 100µg/ml, kanamycin (Km)-  
368 15µg/ml for *X. oryzae* pv. *oryzae* and 50µg/ml for *E. coli*.

### 369 **Rice growth conditions**

370 The TN-1 rice variety, which is susceptible to *X. oryzae* pv. *oryzae* infection, was used to  
371 study bacterial leaf blight symptoms caused by the *X. oryzae* pv. *oryzae* strain BXO43.  
372 Healthy seeds of the plants were surface-sterilized in sodium hypochlorite (Sigma) for 2 min,  
373 rinsed five times in deionized water and imbibed overnight at 28°C. They were then placed  
374 on moist filter paper for 2 days in dark at 28°C. Upon emergence of root and shoot, they were  
375 transferred to 14hr light/ 10hr dark photoperiod in growth chamber (Conviron, Germany).  
376 After 3 days of growth, seedlings were sown in black soil mix. Pots with plants were kept in a  
377 greenhouse in the following conditions: ~30°C/20°C (day/night), ~80% humidity, natural  
378 sunlight with a ~13h/11h light/dark photoperiod.

### 379 **Molecular biology and microbiology techniques**

380 For the amplification and cloning of the wild- type copy of the *xopX* gene, or its 14-3-3  
381 protein binding motif mutants, high-fidelity Phusion polymerase (Finnzymes) was used along  
382 with their respective primers (Supplementary table S1). The genes were cloned into  
383 pENTR/D-TOPO (Invitrogen, California) and further by Gateway LR reaction (Invitrogen,  
384 California) into Gateway compatible vectors. Taq polymerase ReadyMix (KAPA  
385 Biosystems, Wilmington, MA) was used for all screening purposes. For cloning in the pHM1  
386 vector, primers as listed in Supplementary table S1 were used for amplification of the *xopX*  
387 gene and its 14-3-3 protein binding motif mutants using Phusion polymerase (Thermo Fischer  
388 Scientific, Massachusetts). Restriction digestions were carried out using Fast Digest enzymes  
389 (Thermo Fischer Scientific, Massachusetts) specific to the restriction enzyme sites included  
390 in the primers. Ligation reactions for cloning in pHM1 were carried out using T4 DNA ligase  
391 (NEB, Massachusetts).



392 Plasmids were purified using the alkaline lysis method. Gel extractions were carried out using  
393 Macherey Nagel Gel Extraction kits. Agarose gel electrophoresis, transformation of *E. coli*  
394 and electroporation of plasmids into *A. tumefaciens* AGL1 and *X. oryzae* pv. *oryzae* were  
395 performed as described previously (Ray et al., 2000, Subramoni and Sonti, 2005). All cloned  
396 vectors (Supplementary table S2) were confirmed by sequencing (ABI Prism 3700 automated  
397 DNA sequencer). The obtained sequences were subjected to homology searches using the  
398 BLAST algorithm in the National Centre for Biotechnology Information database (Altschul  
399 et al., 1990). Site- directed mutagenesis was done in *xopX* based on prediction of the 14-3-3  
400 protein binding motifs in *xopX*. The conserved serine/threonine residues in the interaction  
401 motifs were mutagenized to alanine to yield a null mutant and to aspartic acid to yield a  
402 phosphomimic mutant using primers in Supplementary table S1. The pENTR::*xopX* plasmid  
403 was used as template.

#### 404 **Yeast two- hybrid assays**

405 The wild- type copy of the *xopX* gene and its 14-3-3 protein binding motif mutants were  
406 cloned in the yeast two-hybrid vector pDEST32 (Invitrogen) using the Gateway cloning  
407 system (Invitrogen, California). The eight rice *14-3-3* genes cloned in the yeast two-hybrid  
408 vector pDEST22 (Invitrogen) were used from a previous study (Deb et al., 2019). For  
409 analysis of interaction of *xopX* with the other effector proteins, the pDEST22 clones  
410 containing *xopN*, *xopQ* and *xopZ* were used, whereas *xopX* was cloned in pDEST32. These  
411 plasmids were transformed into *Saccharomyces cerevisiae* strain pJ694a (James et al., 1996).  
412 Yeast transformation was done using the LiAc/single strand carrier DNA/PEG method as  
413 described by Geitz *et. al* (Gietz and Schiestl, 2007) with changes. Briefly, yeast cells were  
414 grown overnight in YPAD medium (1% (w/v) Bacto-yeast extract, 2% (w/v) Bacto-peptone,  
415 adenine hemisulfate (80 mg/l). Following 12-16h of growth, secondary culture was put using  
416 3% of primary inoculum and the culture was allowed to grow for 4-6h till it reached to

417 O.D.<sub>600</sub>= 0.6- 0.8. Cells were then harvested by centrifugation at 3000rpm for five minutes,  
418 washed with sterile water and resuspended in sterile water. 360µl of transformation mix (40%  
419 PEG3350, 100mM LiAc/TE, 20µg single-stranded carrier DNA and 1µg of each plasmid  
420 DNA) was added per plasmid to be transformed, mixed by vortexing vigorously, and  
421 incubated at 30°C for 30 minutes. The cells were then subjected to heat shock at 42°C for 30  
422 minutes, placed on ice for 5 minutes and plated on selection medium for the respective  
423 transformed vector and grown at 30°C to select for transformants.

424 For screening for interaction, colonies were scraped from plates, patched and grown  
425 overnight in liquid medium with selection at 30°C with shaking. The OD<sub>600</sub> of saturated  
426 cultures was adjusted to 1.0, serial dilutions were made and spotted on the medium with  
427 selection for vector and the medium with selection for interaction (lacking the products of the  
428 reporter genes adenine and histidine) + 1mM 3- amino triazole (3-AT; inhibitor of His3  
429 gene). Growth on the medium for interaction was used to identify the interacting clones. Each  
430 set was repeated three times.

#### 431 **Bimolecular fluorescence complementation (BiFC)**

432 The wild- type copy of *xopX* and its 14-3-3 protein binding motif mutants were cloned by  
433 Gateway cloning (Invitrogen, California) from the pENTR clones to the BiFC vector pDEST-  
434 VYCE(R)GW carrying the C-terminal region of the Venus Fluorescent Protein (VFP) (Gehl  
435 et al., 2009) by Gateway® cloning (Invitrogen, California) from the pENTR clones to yield  
436 the constructs as listed in Supplementary table S2. The eight rice *14-3-3* genes cloned in the  
437 BiFC vector pDEST-VYNE(R)GW carrying the N-terminal region of VFP were used from a  
438 previous study (Deb et al., 2019). To check for XopQ- XopX interaction, *xopQ* was cloned in  
439 pDEST-VYNE(R)GW. These binary vectors obtained were then electroporated into the *A.*  
440 *tumefaciens* strain AGL1 (Supplementary table S2). A suspension of two strains expressing  
441 the gene- nVFP/cVFP fusions were grown to 0.8 O.D.<sub>600</sub>, resuspended in infiltration buffer

442 (10mM MES, 10mM MgCl<sub>2</sub>, 100μM acetosyringone, pH 5.6) and used for transient  
443 expression in *N. benthamiana*. VFP signals were examined 48h after infiltration under a  
444 LSM880 confocal microscope (Carl Zeiss, Germany) using 20x objectives and He-Ne laser at  
445 488nm excitation. Images were analyzed using the ZEN software. Each set was repeated  
446 three times.

#### 447 **Callose deposition in rice**

448 Callose deposition assays were done as described earlier (Adam and Somerville, 1996, Hauck  
449 et al., 2003, Sinha et al., 2013). *X. oryzae* pv. *oryzae* strains were grown to saturation, OD<sub>600</sub>  
450 adjusted to 1.0 using Milli-Q water and infiltrated with a needleless 1ml syringe into leaves  
451 of 14-day old rice plants. 16h after infiltration, the leaves were cut, spanning 0.5 cm on each  
452 side of the infiltration zone, and placed in absolute alcohol at 65°C to remove chlorophyll  
453 completely. This was followed by treatment with 70% ethanol at 65°C and further by MQ  
454 water for rehydration. Subsequently, the samples were stained with 0.05% aniline blue  
455 solution prepared in 150mM K<sub>2</sub>HPO<sub>4</sub>, pH 9.5. The leaves were then washed with MQ water  
456 and observed under an epifluorescence microscope (Nikon, Japan) using a blue filter  
457 (excitation wavelength of 365 nm) and 10x objective. Number of callose were counted per  
458 leaf, excluding the zone of infiltration. At least five such leaves were imaged for each  
459 construct per experiment. Each set was repeated three times.

#### 460 **Defence response associated programmed cell death assay**

461 Assays for programmed cell death in rice roots were performed as described earlier (Sinha et  
462 al., 2013). TN-1 rice seeds were surface sterilised by washing with sodium hypochlorite  
463 (Sigma) followed by three water washes and imbibed with water overnight. The following  
464 day, the seeds were placed for germination on 0.5% sterile agar lined with sterile Whatman  
465 filter paper for 2 days in dark at 28°C. 1cm long root tips were cut from the seedlings and  
466 treated with either *X. oryzae* pv. *oryzae* (strains grown to saturation and O.D.<sub>600</sub> adjusted to

467 1.0 using MQ water) or *A. tumefaciens* AGL1 harbouring the *eGFP::gene* fusions (strains  
468 grown to saturation and O.D.<sub>600</sub> adjusted to 0.8 using infiltration buffer: 10mM MES, 10mM  
469 MgCl<sub>2</sub>, 100μM acetosyringone, pH 5.6). After incubation for 16h, roots were washed and  
470 stained with propidium iodide (PI). The samples were visualised under a LSM-880 confocal  
471 microscope (Carl Zeiss, Germany) using 63x oil immersion objectives and He-Ne laser at  
472 543nm excitation to detect PI internalization. Images were analyzed using the LSM software.  
473 At least five roots were imaged for each construct per experiment. Each set was repeated  
474 three times.

#### 475 **Transient protein expression for localisation in onion epidermal peels**

476 Healthy onion scales (1×1 cm) were placed on plate in such a way that their inner surfaces  
477 were immersed in *A. tumefaciens* AGL1 containing the respective *eGFP-gene* fusions  
478 (O.D.<sub>600</sub> = 1–1.5) resuspended in a solution consisting of 5% (w/v) sucrose, 100 mg  
479 acetosyringone/L and 0.02% (v/v) Silwet-77 for 12h at 28°C. After 12h of incubation, the  
480 onion scales were transferred to plates of 1/2 MS (Murashige and Skoog salts, 30 g sucrose/L  
481 and 0.7% (g/v) agar, pH 5.7) and co-cultivated with *A. tumefaciens* for 2 days. For  
482 visualisation of fluorescence, epidermal peels of the onion scales were carefully removed  
483 using a pair of forceps, stained with DAPI stain (2μg/ml) and mounted on slide using 40%  
484 glycerol. Fluorescence was visualised under an epifluorescence microscope (Nikon, Japan) at  
485 488nm excitation and 10x objective. Each set was repeated three times.

#### 486 **Transient protein expression in *Nicotiana tabacum***

487 The type III effectors were cloned by Gateway cloning (Invitrogen, California) from the  
488 pENTR clones to the pH7WGF2 vector containing the eGFP gene (Karimi et al., 2002) by  
489 Gateway® cloning (Invitrogen, California) from the pENTR clones to yield the constructs as  
490 listed in Supplementary table S2. These binary vectors obtained were then electroporated into  
491 the *A. tumefaciens* strain AGL1 (Supplementary table S2). The strain expressing the

492 eGFP::gene fusions were grown to O.D.<sub>600</sub> = 0.8, resuspended in infiltration buffer (10mM  
493 MES, 10mM MgCl<sub>2</sub>, 100μM acetosyringone, pH 5.6) and used for transient expression in *N.*  
494 *tabacum*. eGFP signals were examined 48h after infiltration under a LSM880 confocal  
495 microscope (Carl Zeiss, Germany) using 20x objectives and He-Ne laser at 488nm excitation.  
496 Images were analyzed using the ZEN software. Each set was repeated three times.

497

#### 498 **Acknowledgements:**

499 This work was supported by grants to RVS from the Plant-Microbe and Soil Interaction  
500 (PMSI) project of the Council of Scientific and Industrial Research (CSIR), Government of  
501 India and the J. C. Bose fellowship to RVS from the Department of Science and Technology  
502 (DST), Government of India. This work was also supported by grants to HKP from the  
503 Council of Scientific and Industrial Research (CSIR), Government of India. SD  
504 acknowledges the Council of Scientific and Industrial Research (CSIR), Government of India  
505 for Ph.D. fellowship. PG acknowledges the Council of Scientific and Industrial Research  
506 (CSIR), Government of India for fellowship.

507

508 **Conflict of interest statement:** The authors declare that no conflict of interest exists.

509 **Data availability statement:** The authors declare that all data has been included in the  
510 manuscript.

511

#### 512 **Short legends for supporting information:**

513 **Supplementary Fig S1. The 14-3-3 protein binding motif mutants of XopQ and XopX**  
514 **interact.** Yeast strain pJ694a was transformed with pDEST32 vector expressing binding  
515 domain (BD) fused with XopX, XopX S84A, XopX S193A, XopX S193D, XopX T430A,  
516 XopX S477A, XopX S477D or XopX T621A, and pDEST22 vector expressing activation

517 domain (AD) fused with XopQ. Transformed colonies were serially diluted and spotted on  
518 the nonselective (SD-LT; double dropout DDO) and selective (SD-AHLT; quadruple dropout  
519 QDO) media with 1mM 3-AT. Observations were noted after 3 days of incubation at 30°C.  
520 Similar results were obtained in three independent experiments.

521 **Supplementary Fig S2. Expression of effectors which can suppress XopQ-XopX**  
522 **induced immune responses.** Leaves of *N. tabacum* were syringe- infiltrated with a  
523 suspension of *A. tumefaciens* AGL1 strain expressing eGFP::AvrBs2, eGFP::XopV,  
524 eGFP::XopG, eGFP::XopP or eGFP::XopU. Fluorescence was visualised in a confocal  
525 microscope at 20x magnification and excitation wavelength (488nm) 48h after infiltration.  
526 Bar, 50µm. Similar results were obtained in three independent experiments.

527 **Supplementary Fig S3. A subset of type III effectors is unable to suppress XopQ- XopX**  
528 **induced PCD.** Rice roots were treated with *A. tumefaciens* strain AGL1 alone or AGL1  
529 expressing eGFP::XopQ + eGFP::XopX, eGFP::XopN, eGFP::XopZ, eGFP::XopY,  
530 eGFP::XopA, eGFP::XopAB, eGFP::XopAE, eGFP::XopC, eGFP::XopI, eGFP::XopK,  
531 eGFP::XopL, eGFP::XopW, eGFP::HpaA, eGFP::XopAD or eGFP::XopF, or pre- treatment  
532 with eGFP::XopN, eGFP::XopZ, eGFP::XopY, eGFP::XopA, eGFP::XopAB,  
533 eGFP::XopAE, eGFP::XopC, eGFP::XopI, eGFP::XopK, eGFP::XopL, eGFP::XopW,  
534 eGFP::HpaA, eGFP::XopAD or eGFP::XopF, followed by overexpression of eGFP::XopQ +  
535 eGFP::XopX. Treated roots (n=5) were subsequently stained with propidium iodide (PI) and  
536 observed under a confocal microscope using a 63x oil immersion objectives and He-Ne laser  
537 at 543nm excitation to detect PI internalization. Internalization of PI is indicative of defence  
538 response-associated programmed cell death in rice roots. Bar, 20µm. Similar results were  
539 obtained in three independent experiments.

540 **Supplementary Fig S4. Expression of effectors which are unable to suppress XopQ-**  
541 **XopX induced immune responses.** Leaves of *N. tabacum* were syringe- infiltrated with a

542 suspension of *A. tumefaciens* AGL1 strain expressing eGFP::XopI, eGFP::XopK,  
543 eGFP::XopL, eGFP::XopAD, eGFP::HpaA, eGFP::XopW, eGFP::XopA, eGFP::XopAE,  
544 eGFP::XopC, eGFP::XopF, eGFP::XopAB, eGFP::XopN, eGFP::XopZ or eGFP::XopY.  
545 Fluorescence was visualised in a confocal microscope at 20x magnification and excitation  
546 wavelength (488nm) 48h after infiltration. Bar, 50µm. Similar results were obtained in three  
547 independent experiments.

548 **Supplementary Fig S5. Model explaining induction of immune responses by XopQ-**  
549 **XopX.** Cell wall damage is perceived by the host plant to induce a cascade of cellular  
550 responses which finally lead to the activation of immune responses in rice. The 14-3-3  
551 proteins are putative activators of the rice immune responses. XopQ and XopX interact with  
552 their cognate 14-3-3 partners Gf14f/g or Gf14d/e respectively to suppress the plant immune  
553 responses. However, interaction of XopQ and XopX leads to the activation of the rice  
554 immune responses, which can be further suppressed by XopG, XopP, XopU, XopV and  
555 AvrBs2. The molecules marked in red are the putative candidates involved in the activation  
556 of rice immune responses.

557 **Supplementary table S1.** List of primers used in the study

558 **Supplementary table S2.** List of plasmids used in the study

559 **Supplementary table S3.** List of strains used in the study

560 **Supplementary table S4.** Details of annotated *X. oryzae* pv. *oryzae* effectors screened for  
561 suppression of XopQ- XopX mediated immune responses

562

563 **Figure legends:**

564 **Fig 1. The *X. oryzae* pv. *oryzae* XopX protein interacts with two rice 14-3-3 proteins,**

565 **Gf14d and Gf14e. (A)** Yeast strain pJ694a containing pDEST32 vector expressing binding

566 domain (BD) fusion with XopX was independently transformed with pDEST22 vector  
567 expressing activation domain (AD) fusion with Gf14a-h. Transformed colonies were serially  
568 diluted and spotted on the nonselective -LT (-Leu -Trp) double dropout (DDO) media and  
569 selective -AHLT (-Ade -Leu -Trp -His) quadruple dropout (QDO) media with 1mM 3-amino-  
570 1,2,4-triazole (3-AT). Observations were noted after 3 days of incubation at 30°C. Similar  
571 results were obtained in three independent experiments. **(B)** For BiFC analysis of XopX- 14-  
572 3-3 interactions, leaves of *N. benthamiana* were syringe- infiltrated with a suspension of two  
573 *A. tumefaciens* AGL1 strains containing empty vectors alone or BiFC vectors expressing  
574 cVFP::XopX and nVFP::Gf14d or nVFP::Gf14e. Fluorescence was visualised in a confocal  
575 microscope at 20x magnification and excitation wavelength (488nm) 48h after infiltration.  
576 Bar, 50µm. Similar results were obtained in three independent experiments.

577 **Fig 2. Mutation in the serine- 193 and serine- 477 containing 14-3-3 protein binding**  
578 **motifs of XopX abolishes its ability to interact with the 14-3-3 proteins Gf14d and**  
579 **Gf14e. (A & B)** Yeast two- hybrid reporter strain pJ694a was transformed with the pDEST32  
580 vector expressing binding domain (BD) fusion with XopX, XopX S84A, XopX S193A,  
581 XopX S193D, XopX T430A, XopX S477A, XopX S477D or XopX T621A and the prey  
582 vector pDEST22 vector expressing activation domain (AD) fusion with Gf14d **(A)** or Gf14e  
583 **(B)**. Transformed colonies were spotted on nonselective -LT (-Leucine -Tryptophan) double  
584 dropout (DDO) media and selective -AHLT (-Adenine -Histidine -Leucine -Tryptophan)  
585 quadruple dropout (QDO) media with 1mM 3-AT. Observations were noted after incubation  
586 at 30°C for 3 days. Similar results were obtained in three independent experiments. **(C & D)**  
587 BiFC analysis of XopX- 14-3-3 interactions in *N. benthamiana*. Leaves were syringe-  
588 infiltrated with a suspension of two *A. tumefaciens* AGL1 strains expressing cVFP::XopX,  
589 cVFP::XopX S193A, cVFP::XopX S193D, cVFP::XopX S477A or cVFP::XopX S477D and  
590 nVFP::Gf14d or nVFP::Gf14e. Fluorescence was visualised in a confocal microscope at 20x



591 magnification and excitation wavelength (488nm) 48h after infiltration. Bar, 50µm. Similar  
592 results were obtained in three independent experiments.

593 **Fig 3. Mutation in the serine- 193 and serine- 477 containing 14-3-3 protein binding**  
594 **motifs of XopX abolishes its ability to suppress the rice immune responses (A)** Rice roots  
595 were treated with one of the following: Milli-Q (MQ) water, *X. oryzae* pv. *oryzae* BXO43  
596 (wild- type) or the quadruple mutant (QM) strain harbouring the following: pHM1 empty  
597 vector alone, or pHM1 expressing XopX, XopX S84A, XopX S193A, XopX S193D, XopX  
598 T430A, XopX S477A, XopX S477D or XopX T621A. Treated roots were subsequently  
599 stained with propidium iodide (PI) and observed under a confocal microscope using 63x oil  
600 immersion objectives and He-Ne laser at 543nm excitation to detect PI internalization. Five  
601 roots were imaged for each construct per experiment. Bar, 20µm. Internalization of PI is  
602 indicative of defence response-associated programmed cell death. Similar results were  
603 obtained in three independent experiments. **(B & C)** For callose deposition assay, leaves of  
604 two-week old rice seedlings were infiltrated with one of the following: MQ water, BXO43,  
605 QM strain and QM harbouring the following: pHM1 empty vector alone, or pHM1  
606 expressing XopX, XopX S84A, XopX S193A, XopX S193D, XopX T430A, XopX S477A,  
607 XopX S477D or XopX T621A. The leaves were stained 16h later with aniline blue and  
608 visualized under an epifluorescence microscope (365nm) at 10x magnification. Mean and  
609 standard deviation were calculated for number of callose deposits observed per leaf. Error  
610 bars indicate the standard deviation of readings from five infiltrated leaves. Columns in plots  
611 capped with the same letter were not significantly different from each other based on analysis  
612 of variance done using the Tukey-Kramer honestly significance difference test ( $P < 0.05$ ).  
613 Bar, 100µm. Similar results were obtained in three independent experiments.

614 **Fig 4. Mutation in the serine- 193 and serine- 477 containing 14-3-3 protein binding**  
615 **motifs of XopX alters its subcellular localization.** *A. tumefaciens* strain AGL1 expressing

616 one of the following was co-cultivated with onion epidermal peels: eGFP::XopX,  
617 eGFP::XopX S193A, eGFP::XopX S193D, eGFP::XopX S477A or eGFP::XopX S477D.  
618 Fluorescence was visualised in an epifluorescence microscope at 10x magnification and  
619 excitation wavelength (488nm) 48h after co-cultivation. Bar, 100µm. Similar results were  
620 obtained in three independent experiments.

621 **Fig 5. The *X. oryzae* pv. *oryzae* XopQ and XopX proteins interact.** (A) Yeast strain pJ694a  
622 was transformed with pDEST32 vector expressing binding domain (BD) fused with XopX  
623 and pDEST22 vector expressing activation domain (AD) fused with XopQ. Transformed  
624 colonies were serially diluted and spotted on the nonselective (SD-LT; double dropout DDO)  
625 and selective (SD-AHLT; quadruple dropout QDO) media with 1mM 3-AT. Observations  
626 were noted after 3 days of incubation at 30°C. Similar results were obtained in three  
627 independent experiments. (B) For BiFC analysis of XopQ- XopX interactions, onion  
628 epidermal peels were co-cultivated with two *A. tumefaciens* AGL1 strains expressing  
629 nVFP::XopQ and cVFP::XopX. Fluorescence was visualised in an epifluorescence  
630 microscope at 10x magnification and excitation wavelength (488nm) 48h after co-cultivation.  
631 Bar, 100µm. Similar results were obtained in three independent experiments.

632 **Fig 6. Overexpression of the XopQ-XopX, induces the rice immune responses.** (A) Rice  
633 roots were treated with one of the following: *A. tumefaciens* strain AGL1 alone or AGL1  
634 expressing eGFP::XopQ, eGFP::XopX or eGFP::XopQ + eGFP::XopX. Treated roots (n=5)  
635 were subsequently stained with propidium iodide (PI) and observed under a confocal  
636 microscope using a 63x oil immersion objectives and He-Ne laser at 543nm excitation to  
637 detect PI internalization. Internalization of PI is indicative of defence response-associated  
638 programmed cell death in rice roots. Bar, 20µm. Similar results were obtained in three  
639 independent experiments. (B & C) For callose deposition assay, leaves of 14-day old rice  
640 seedlings were infiltrated with one of the following: *A. tumefaciens* AGL1 alone or AGL1

641 expressing eGFP::XopQ, eGFP::XopX or with a suspension of two strains expressing  
642 eGFP::XopQ + eGFP::XopX. The leaves were stained 16h later with aniline blue and  
643 visualized under an epifluorescence microscope (365nm) at 10x magnification. Mean and  
644 standard deviation were calculated for number of callose deposits observed per leaf. Error  
645 bars indicate the standard deviation of readings from 5 inoculated leaves. Columns in plots  
646 capped with the same letter were not significantly different from each other based on analysis  
647 of variance done using the Tukey-Kramer honestly significance difference test ( $P < 0.05$ ).  
648 Bar, 100 $\mu$ m. Similar results were obtained in three independent experiments.

649 **Fig 7. XopX interaction with the rice 14-3-3 proteins is essential for XopQ- XopX**  
650 **induced immune responses. (A)** Rice roots were treated with *A. tumefaciens* strain AGL1  
651 alone or AGL1 expressing eGFP::XopQ, eGFP::XopX, eGFP::XopQ + eGFP::XopX,  
652 eGFP::XopX S193A, eGFP::XopQ + eGFP::XopX S193A, eGFP::XopX S193D,  
653 eGFP::XopQ + eGFP::XopX S193D, eGFP::XopX S477A, eGFP::XopQ + eGFP::XopX  
654 S477A, eGFP::XopX S477D or eGFP::XopQ + eGFP::XopX S477D. Treated roots (n=5)  
655 were subsequently stained with propidium iodide (PI) and observed under a confocal  
656 microscope using a 63x oil immersion objectives and He-Ne laser at 543nm excitation to  
657 detect PI internalization. Internalization of PI is indicative of defence response-associated  
658 programmed cell death in rice roots. Bar, 20 $\mu$ m. Similar results were obtained in three  
659 independent experiments. **(B & C)** For callose deposition assay, leaves of 14-day old rice  
660 seedlings were infiltrated with one of the following: *A. tumefaciens* strain AGL1 alone or  
661 AGL1 expressing eGFP::XopQ, eGFP::XopX, eGFP::XopQ + eGFP::XopX, eGFP::XopX  
662 S193A, eGFP::XopQ + eGFP::XopX S193A, eGFP::XopX S193D, eGFP::XopQ +  
663 eGFP::XopX S193D, eGFP::XopX S477A, eGFP::XopQ + eGFP::XopX S477A,  
664 eGFP::XopX S477D or eGFP::XopQ + eGFP::XopX S477D. The leaves were stained 16h  
665 later with aniline blue and visualized under an epifluorescence microscope (365nm) at 10x

666 magnification. Bar, 100µm. Mean and standard deviation were calculated for number of  
667 callose deposits observed per leaf. Error bars indicate the standard deviation of readings from  
668 5 inoculated leaves. Columns in plots capped with the same letter were not significantly  
669 different from each other based on analysis of variance done using the Tukey-Kramer  
670 honestly significance difference test ( $P < 0.05$ ). Similar results were obtained in three  
671 independent experiments.

672 **Fig 8. XopG, XopP, XopU, XopV and AvrBs2 can suppress XopQ- XopX induced**  
673 **immune responses (A)** Rice roots were treated with *A. tumefaciens* strain AGL1 alone or  
674 AGL1 expressing *A. tumefaciens* AGL1 alone or AGL1 expressing eGFP::XopQ +  
675 eGFP::XopX, eGFP::XopG, eGFP::XopP, eGFP::XopU, eGFP::XopV or eGFP::AvrBs2, or  
676 pre- treatment with eGFP::XopG, eGFP::XopP, eGFP::XopU, eGFP::XopV or  
677 eGFP::AvrBs2, followed by overexpression of eGFP::XopQ + eGFP::XopX. Treated roots  
678 (n=5) were subsequently stained with propidium iodide (PI) and observed under a confocal  
679 microscope using a 63x oil immersion objectives and He-Ne laser at 543nm excitation to  
680 detect PI internalization. Internalization of PI is indicative of defence response-associated  
681 programmed cell death in rice roots. Bar, 20µm. Similar results were obtained in three  
682 independent experiments. **(B & C)** For callose deposition assay, leaves of 14-day old rice  
683 seedlings were infiltrated with one of the following: *A. tumefaciens* AGL1 alone or AGL1  
684 expressing eGFP::XopQ + eGFP::XopX, eGFP::XopG, eGFP::XopQ + eGFP::XopX +  
685 eGFP::XopG, eGFP::XopP, eGFP::XopQ + eGFP::XopX + eGFP::XopP, eGFP::XopU,  
686 eGFP::XopQ + eGFP::XopX + eGFP::XopU, eGFP::XopV, eGFP::XopQ + eGFP::XopX +  
687 eGFP::XopV, eGFP::AvrBs2 or eGFP::XopQ + eGFP::XopX + eGFP::AvrBs2. The leaves  
688 were stained 16h later with aniline blue and visualized under an epifluorescence microscope  
689 (365nm) at 10x magnification. Bar, 100µm. Mean and standard deviation were calculated for  
690 number of callose deposits observed per leaf. Error bars indicate the standard deviation of

691 readings from 5 inoculated leaves. Columns in plots capped with the same letter were not  
692 significantly different from each other based on analysis of variance done using the Tukey-  
693 Kramer honestly significance difference test ( $P < 0.05$ ). Similar results were obtained in three  
694 independent experiments.

695

## 696 **References**

- 697 ADAM, L. & SOMERVILLE, S. C. 1996. Genetic characterization of five powdery mildew disease  
698 resistance loci in *Arabidopsis thaliana*. *Plant J*, 9, 341-56.
- 699 ALTSCHUL, S. F., GISH, W., MILLER, W., MYERS, E. W. & LIPMAN, D. J. 1990. Basic local alignment  
700 search tool. *J Mol Biol*, 215, 403-10.
- 701 ARITUA, V., HARRISON, J., SAPP, M., BURUCHARA, R., SMITH, J. & STUDHOLME, D. J. 2015. Genome  
702 sequencing reveals a new lineage associated with lablab bean and genetic exchange  
703 between *Xanthomonas axonopodis* pv. *phaseoli* and *Xanthomonas fuscans* subsp. *fuscans*.  
704 *Frontiers in Microbiology*, 6.
- 705 BADEL, J. L., SHIMIZU, R., OH, H. S. & COLLMER, A. 2006. A *Pseudomonas syringae* pv. *tomato*  
706 *avrE1/hopM1* mutant is severely reduced in growth and lesion formation in tomato. *Mol*  
707 *Plant Microbe Interact*, 19, 99-111.
- 708 CHEN, F., LI, Q., SUN, L. & HE, Z. 2006. The rice 14-3-3 gene family and its involvement in responses  
709 to biotic and abiotic stress. *DNA Res*, 13, 53-63.
- 710 CHISHOLM, S. T., COAKER, G., DAY, B. & STASKAWICZ, B. J. 2006. Host-microbe interactions: shaping  
711 the evolution of the plant immune response. *Cell*, 124, 803-14.
- 712 COTELLE, V. & LEONHARDT, N. 2015. 14-3-3 Proteins in Guard Cell Signaling. *Front Plant Sci*, 6, 1210.
- 713 COTELLE, V., MEEK, S. E., PROVAN, F., MILNE, F. C., MORRICE, N. & MACKINTOSH, C. 2000. 14-3-3s  
714 regulate global cleavage of their diverse binding partners in sugar-starved *Arabidopsis* cells.  
715 *Embo j*, 19, 2869-76.
- 716 DEB, S., GUPTA, M. K., PATEL, H. K. & SONTI, R. V. 2019. *Xanthomonas oryzae* pv. *oryzae* XopQ  
717 protein suppresses rice immune responses through interaction with two 14-3-3 proteins but  
718 its phospho-null mutant induces rice immune responses and interacts with another 14-3-3  
719 protein. *Mol Plant Pathol*.
- 720 DUBROW, Z., SUNITHA, S., KIM, J. G., AAKRE, C., GIRIJA, A. M., SOBOL, G., TEPER, D., CHEN, Y. C.,  
721 OZBAKI-YAGAN, N., VANCE, H., SESSA, G. & MUDGETT, M. B. 2018. Tomato 14-3-3 proteins  
722 are required for Xv3 disease resistance and interact with a subset of *Xanthomonas*  
723 *euvasicatoria* effectors. *Mol Plant Microbe Interact*.
- 724 GEHL, C., WAADT, R., KUDLA, J., MENDEL, R. R. & HANSCH, R. 2009. New GATEWAY vectors for high  
725 throughput analyses of protein-protein interactions by bimolecular fluorescence  
726 complementation. *Mol Plant*, 2, 1051-8.
- 727 GIETZ, R. D. & SCHIESTL, R. H. 2007. High-efficiency yeast transformation using the LiAc/SS carrier  
728 DNA/PEG method. *Nat Protoc*, 2, 31-4.
- 729 GISKA, F., LICHOCKA, M., PIECHOCKI, M., DADLEZ, M., SCHMELZER, E., HENNIG, J. & KRZYMOWSKA,  
730 M. 2013. Phosphorylation of HopQ1, a type III effector from *Pseudomonas syringae*, creates  
731 a binding site for host 14-3-3 proteins. *Plant Physiol*, 161, 2049-61.
- 732 GUPTA, M. K., NATHAWAT, R., SINHA, D., HAQUE, A. S., SANKARANARAYANAN, R. & SONTI, R. V.  
733 2015. Mutations in the Predicted Active Site of *Xanthomonas oryzae* pv. *oryzae* XopQ

- 734 Differentially Affect Virulence, Suppression of Host Innate Immunity, and Induction of the HR  
735 in a Nonhost Plant. *Mol Plant Microbe Interact*, 28, 195-206.
- 736 HAJRI, A., BRIN, C., HUNAUULT, G., LARDEUX, F., LEMAIRE, C., MANCEAU, C., BOUREAU, T. &  
737 POUSSIER, S. 2009. A "repertoire for repertoire" hypothesis: repertoires of type three  
738 effectors are candidate determinants of host specificity in *Xanthomonas*. *PLoS One*, 4,  
739 e6632.
- 740 HAUCK, P., THILMONY, R. & HE, S. Y. 2003. A *Pseudomonas syringae* type III effector suppresses cell  
741 wall-based extracellular defense in susceptible *Arabidopsis* plants. *Proc Natl Acad Sci U S A*,  
742 100, 8577-82.
- 743 ISHIKAWA, K., YAMAGUCHI, K., SAKAMOTO, K., YOSHIMURA, S., INOUE, K., TSUGE, S., KOJIMA, C. &  
744 KAWASAKI, T. 2014. Bacterial effector modulation of host E3 ligase activity suppresses  
745 PAMP-triggered immunity in rice. *Nat Commun*, 5, 5430.
- 746 JALAN, N., KUMAR, D., YU, F., JONES, J. B., GRAHAM, J. H. & WANG, N. 2013. Complete Genome  
747 Sequence of *Xanthomonas citri* subsp. *citri* Strain Aw12879, a Restricted-Host-Range Citrus  
748 Canker-Causing Bacterium. *Genome Announc*, 1.
- 749 JAMES, P., HALLADAY, J. & CRAIG, E. A. 1996. Genomic libraries and a host strain designed for highly  
750 efficient two-hybrid selection in yeast. *Genetics*, 144, 1425-36.
- 751 JONES, J. D. & DANGL, J. L. 2006. The plant immune system. *Nature*, 444, 323-9.
- 752 KARIMI, M., INZE, D. & DEPICKER, A. 2002. GATEWAY vectors for *Agrobacterium*-mediated plant  
753 transformation. *Trends Plant Sci*, 7, 193-5.
- 754 KEARNEY, B. & STASKAWICZ, B. J. 1990. Widespread distribution and fitness contribution of  
755 *Xanthomonas campestris* avirulence gene *avrBs2*. *Nature*, 346, 385-386.
- 756 LI, S., WANG, Y., WANG, S., FANG, A., WANG, J., LIU, L., ZHANG, K., MAO, Y. & SUN, W. 2015. The  
757 Type III Effector *AvrBs2* in *Xanthomonas oryzae* pv. *oryzicola* Suppresses Rice Immunity and  
758 Promotes Disease Development. *Mol Plant Microbe Interact*, 28, 869-80.
- 759 LI, W., YADETA, K. A., ELMORE, J. M. & COAKER, G. 2013. The *Pseudomonas syringae* effector *HopQ1*  
760 promotes bacterial virulence and interacts with tomato 14-3-3 proteins in a  
761 phosphorylation-dependent manner. *Plant Physiol*, 161, 2062-74.
- 762 METZ, M., DAHLBECK, D., MORALES, C. Q., AL SADY, B., CLARK, E. T. & STASKAWICZ, B. J. 2005. The  
763 conserved *Xanthomonas campestris* pv. *vesicatoria* effector protein *XopX* is a virulence  
764 factor and suppresses host defense in *Nicotiana benthamiana*. *Plant J*, 41, 801-14.
- 765 MIDHA, S., BANSAL, K., KUMAR, S., GIRIJA, A. M., MISHRA, D., BRAHMA, K., LAHA, G. S., SUNDARAM,  
766 R. M., SONTI, R. V. & PATIL, P. B. 2017. Population genomic insights into variation and  
767 evolution of *Xanthomonas oryzae* pv. *oryzae*. *Scientific reports*, 7, 40694-40694.
- 768 MOREIRA, L. M., ALMEIDA, N. F., JR., POTNIS, N., DIGIAMPIETRI, L. A., ADI, S. S., BORTOLOSSI, J. C.,  
769 DA SILVA, A. C., DA SILVA, A. M., DE MORAES, F. E., DE OLIVEIRA, J. C., DE SOUZA, R. F.,  
770 FACINCANI, A. P., FERRAZ, A. L., FERRO, M. I., FURLAN, L. R., GIMENEZ, D. F., JONES, J. B.,  
771 KITAJIMA, E. W., LAIA, M. L., LEITE, R. P., JR., NISHIYAMA, M. Y., RODRIGUES NETO, J.,  
772 NOCITI, L. A., NORMAN, D. J., OSTROSKI, E. H., PEREIRA, H. A., JR., STASKAWICZ, B. J., TEZZA,  
773 R. I., FERRO, J. A., VINATZER, B. A. & SETUBAL, J. C. 2010. Novel insights into the genomic  
774 basis of citrus canker based on the genome sequences of two strains of *Xanthomonas*  
775 *fuscans* subsp. *aurantifolii*. *BMC Genomics*, 11, 238.
- 776 OH, C. S. & MARTIN, G. B. 2011. Effector-triggered immunity mediated by the *Pto* kinase. *Trends*  
777 *Plant Sci*, 16, 132-40.
- 778 POTNIS, N., KRASILEVA, K., CHOW, V., ALMEIDA, N. F., PATIL, P. B., RYAN, R. P., SHARLACH, M.,  
779 BEHLAU, F., DOW, J. M., MOMOL, M., WHITE, F. F., PRESTON, J. F., VINATZER, B. A.,  
780 KOEBNIK, R., SETUBAL, J. C., NORMAN, D. J., STASKAWICZ, B. J. & JONES, J. B. 2011.  
781 Comparative genomics reveals diversity among *xanthomonads* infecting tomato and pepper.  
782 *BMC Genomics*, 12, 146.

- 783 RAY, S. K., RAJESHWARI, R. & SONTI, R. V. 2000. Mutants of *Xanthomonas oryzae* pv. *oryzae* deficient  
784 in general secretory pathway are virulence deficient and unable to secrete xylanase. *Mol*  
785 *Plant Microbe Interact*, 13, 394-401.
- 786 SAIJO, Y., LOO, E. P. & YASUDA, S. 2018. Pattern recognition receptors and signaling in plant-microbe  
787 interactions. *Plant J*, 93, 592-613.
- 788 SINHA, D., GUPTA, M. K., PATEL, H. K., RANJAN, A. & SONTI, R. V. 2013. Cell wall degrading enzyme  
789 induced rice innate immune responses are suppressed by the type 3 secretion system  
790 effectors XopN, XopQ, XopX and XopZ of *Xanthomonas oryzae* pv. *oryzae*. *PLoS One*, 8,  
791 e75867.
- 792 SOTO-SUAREZ, M., BERNAL, D., GONZALEZ, C., SZUREK, B., GUYOT, R., TOHME, J. & VERDIER, V.  
793 2010. In planta gene expression analysis of *Xanthomonas oryzae* pathovar *oryzae*, African  
794 strain MA11. *BMC Microbiol*, 10, 170.
- 795 STORK, W., KIM, J. G. & MUDGETT, M. B. 2015. Functional Analysis of Plant Defense Suppression and  
796 Activation by the *Xanthomonas* Core Type III Effector XopX. *Mol Plant Microbe Interact*, 28,  
797 180-94.
- 798 SUBRAMONI, S. & SONTI, R. V. 2005. Growth deficiency of a *Xanthomonas oryzae* pv. *oryzae* fur  
799 mutant in rice leaves is rescued by ascorbic acid supplementation. *Mol Plant Microbe*  
800 *Interact*, 18, 644-51.
- 801 TEPER, D., SALOMON, D., SUNITHA, S., KIM, J. G., MUDGETT, M. B. & SESSA, G. 2014. *Xanthomonas*  
802 *euvescicatoria* type III effector XopQ interacts with tomato and pepper 14-3-3 isoforms to  
803 suppress effector-triggered immunity. *Plant J*, 77, 297-309.
- 804 TEPER, D., SUNITHA, S., MARTIN, G. B. & SESSA, G. 2015. Five *Xanthomonas* type III effectors  
805 suppress cell death induced by components of immunity-associated MAP kinase cascades.  
806 *Plant Signal Behav*, 10, e1064573.
- 807 THIEME, F., KOEBNIK, R., BEKEL, T., BERGER, C., BOCH, J., BUTTNER, D., CALDANA, C., GAIGALAT, L.,  
808 GOESMANN, A., KAY, S., KIRCHNER, O., LANZ, C., LINKE, B., MCHARDY, A. C., MEYER, F.,  
809 MITTENHUBER, G., NIES, D. H., NIESBACH-KLOSGEN, U., PATSCHKOWSKI, T., RUCKERT, C.,  
810 RUPP, O., SCHNEIKER, S., SCHUSTER, S. C., VORHOLTER, F. J., WEBER, E., PUHLER, A., BONAS,  
811 U., BARTELS, D. & KAISER, O. 2005. Insights into genome plasticity and pathogenicity of the  
812 plant pathogenic bacterium *Xanthomonas campestris* pv. *vesicatoria* revealed by the  
813 complete genome sequence. *J Bacteriol*, 187, 7254-66.
- 814 ÜSTÜN, S., BARTETZKO, V. & BÖRNKE, F. 2013. The *Xanthomonas campestris* Type III Effector XopJ  
815 Targets the Host Cell Proteasome to Suppress Salicylic-Acid Mediated Plant Defence. *PLOS*  
816 *Pathogens*, 9, e1003427.
- 817 WHITE, F. F. & YANG, B. 2009. Host and pathogen factors controlling the rice-*Xanthomonas oryzae*  
818 interaction. *Plant Physiol*, 150, 1677-86.
- 819 XIANG, T., ZONG, N., ZOU, Y., WU, Y., ZHANG, J., XING, W., LI, Y., TANG, X., ZHU, L., CHAI, J. & ZHOU,  
820 J. M. 2008. *Pseudomonas syringae* effector AvrPto blocks innate immunity by targeting  
821 receptor kinases. *Curr Biol*, 18, 74-80.

Figure 1

**A**

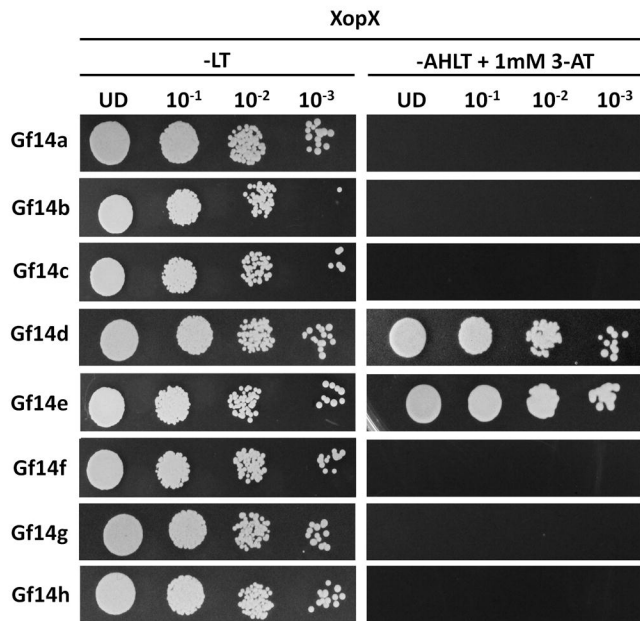

**B**

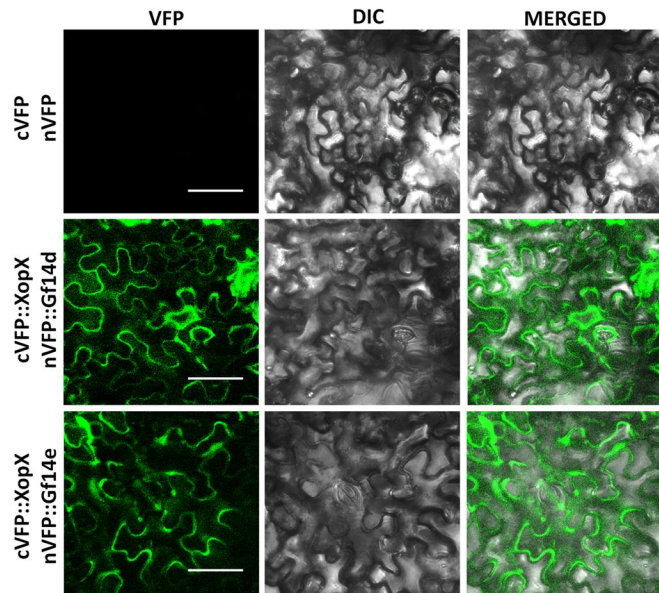



**Figure 2****A**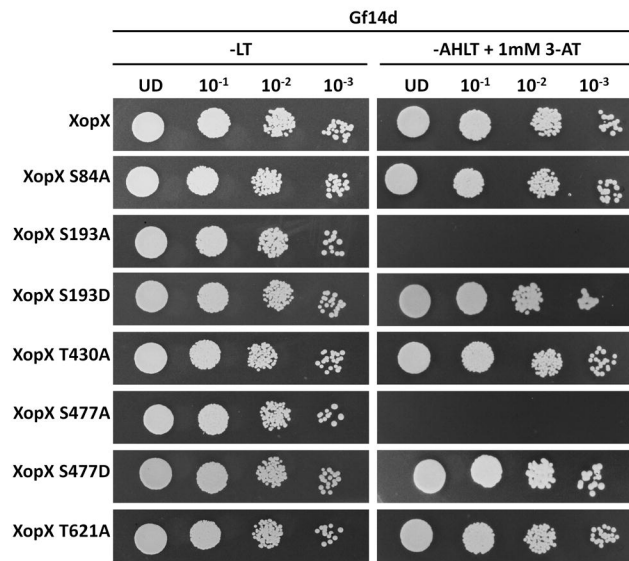**B**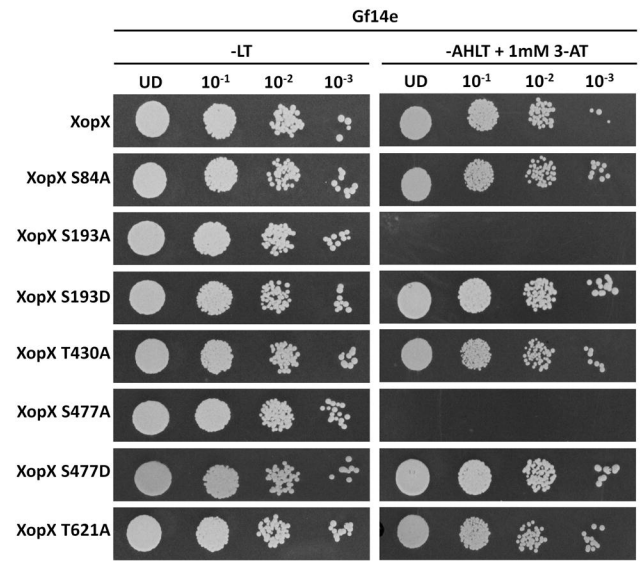**C**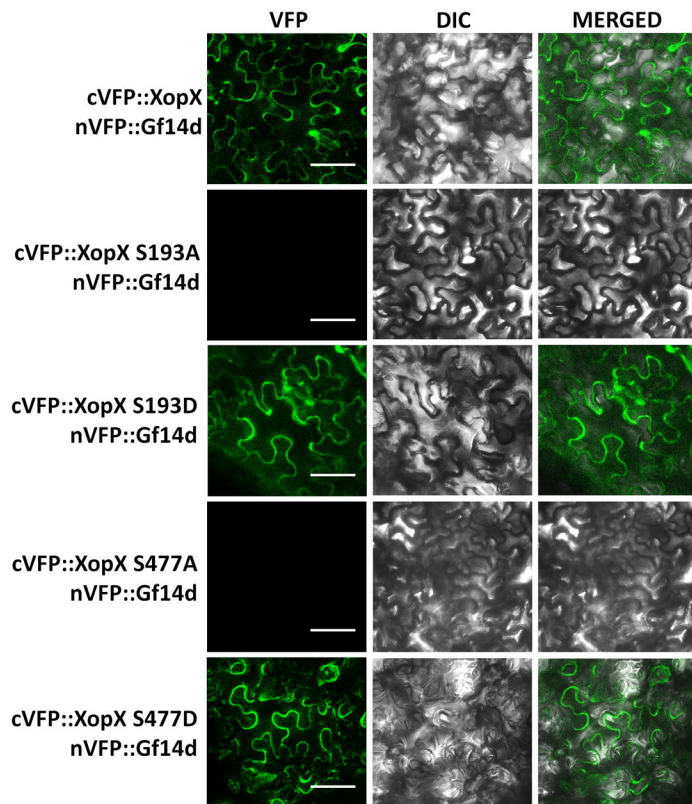**D**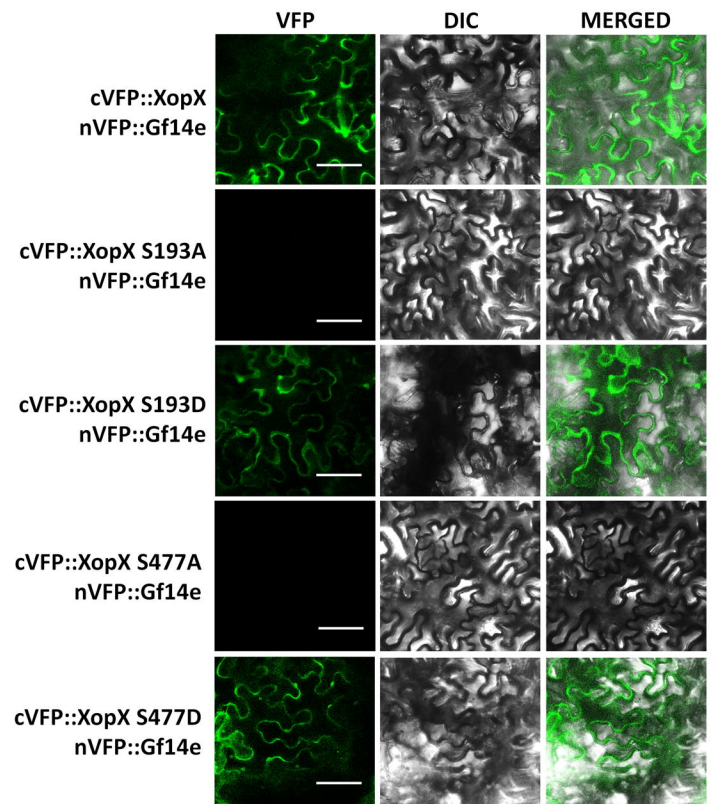

**A****Figure 3**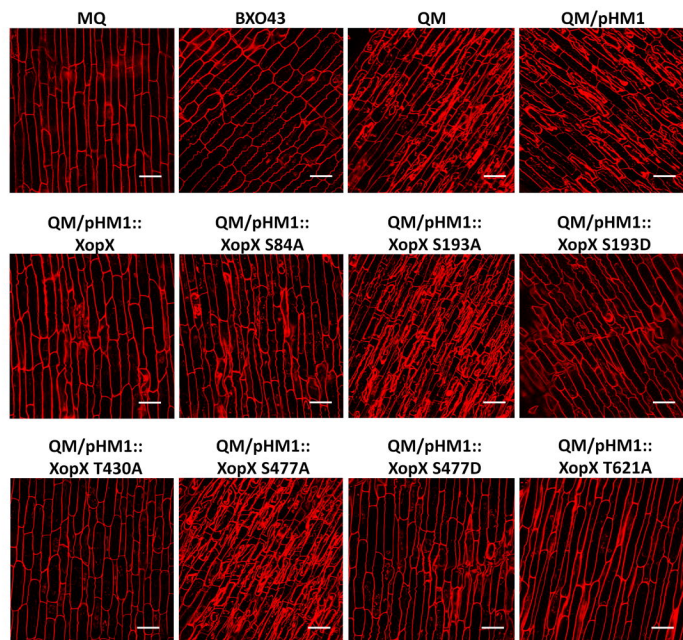**B**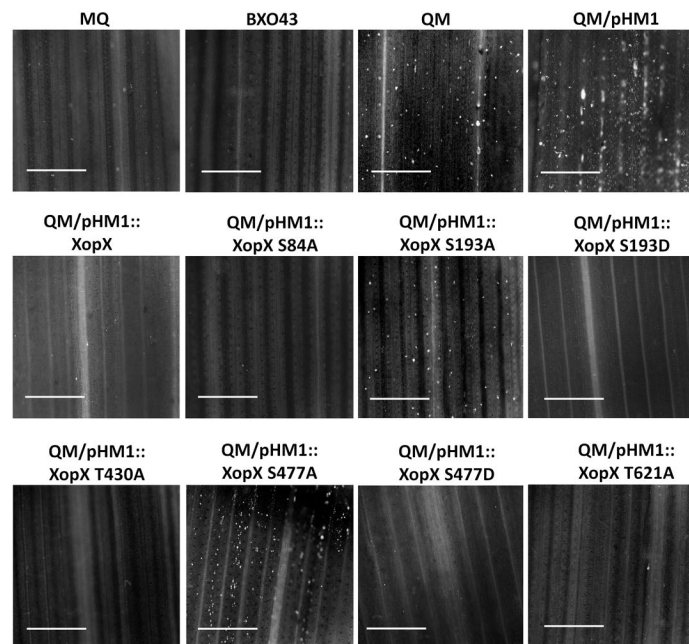**C**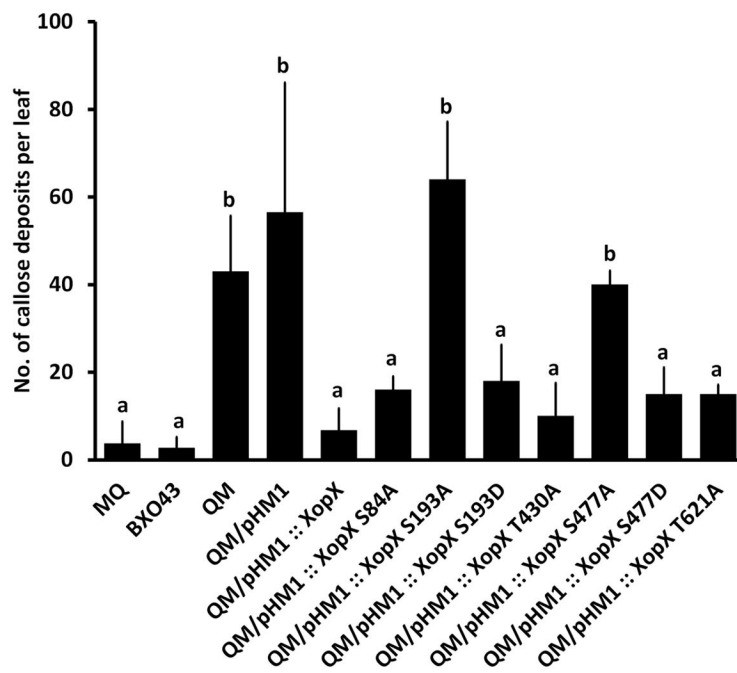

**Figure 4**

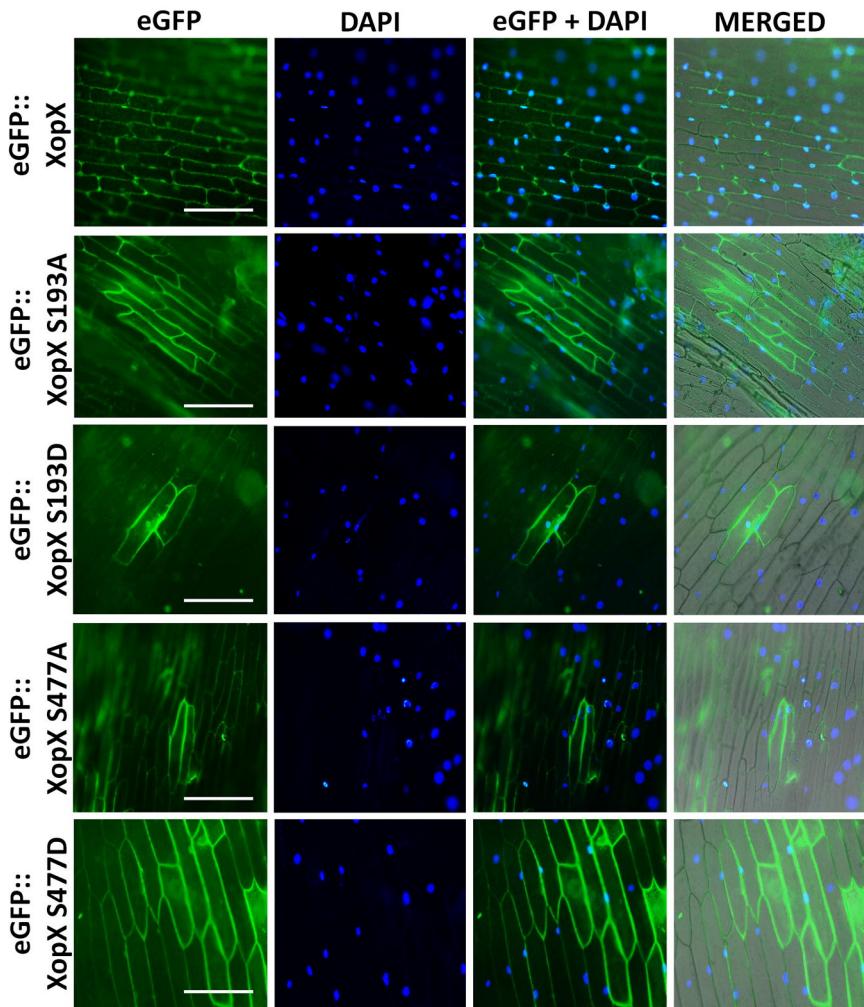

**Figure 5**

**A**

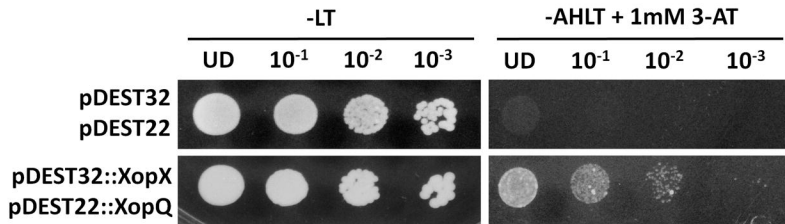

**B**

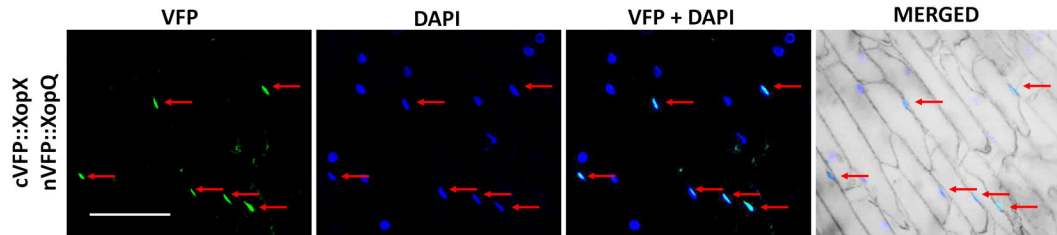

Figure 6

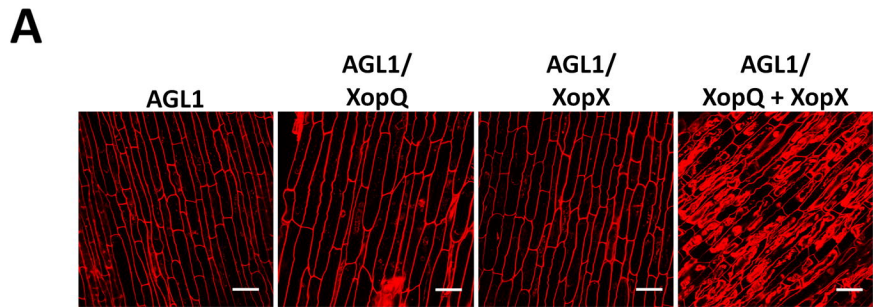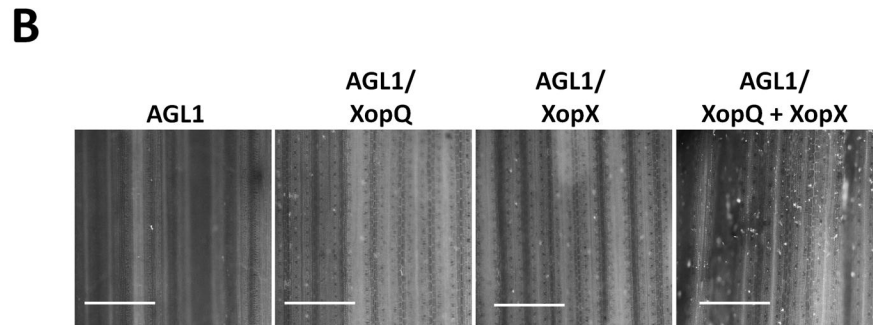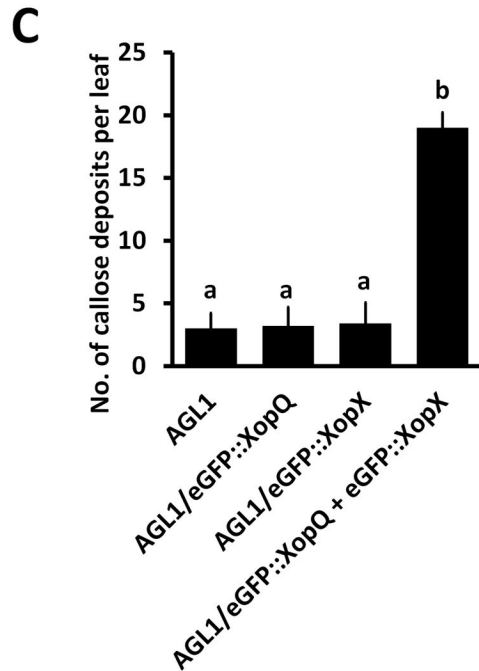

Figure 7

**A**

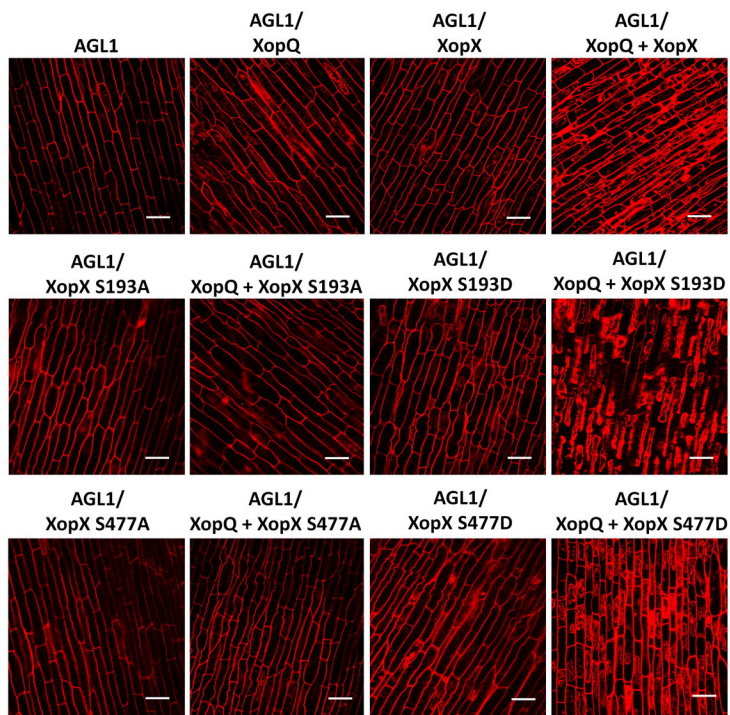

**B**

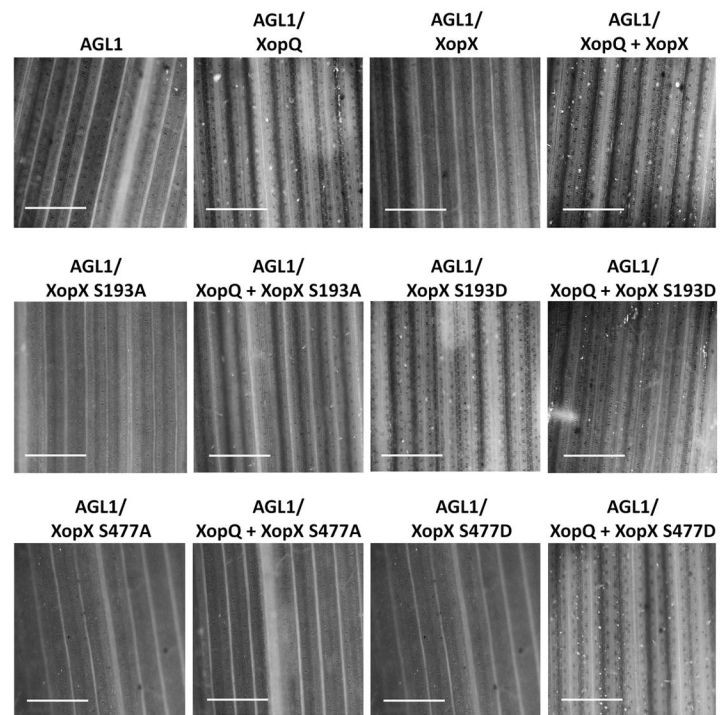

**C**

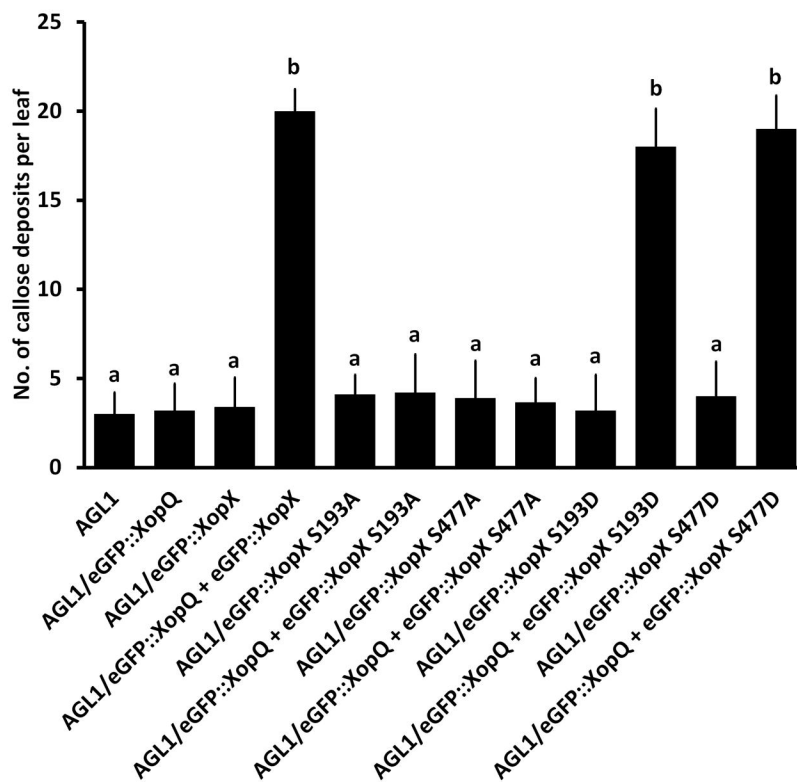

**Figure 8****A**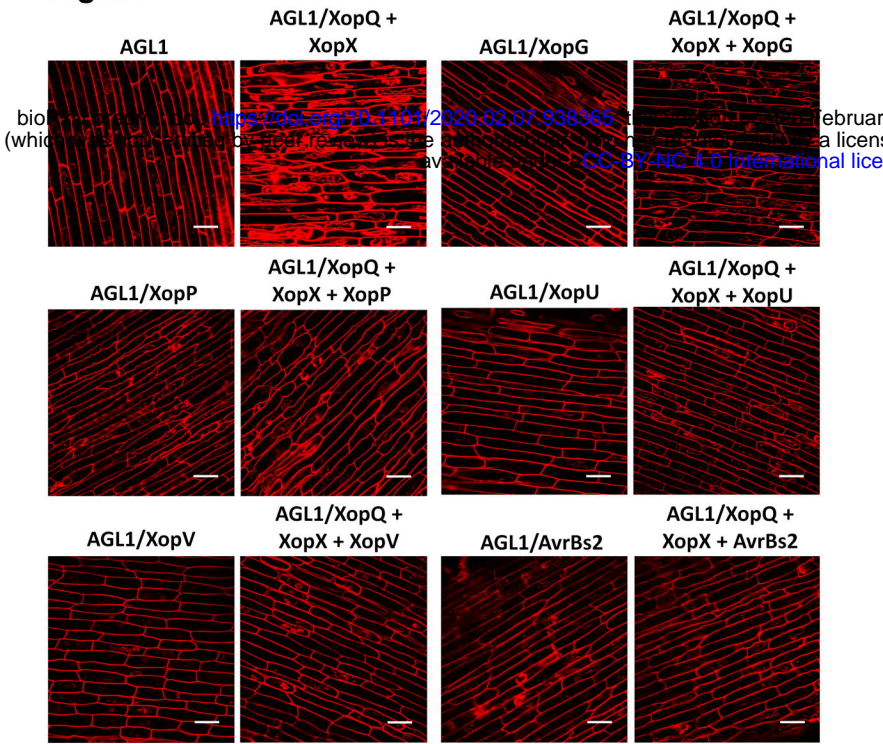**B**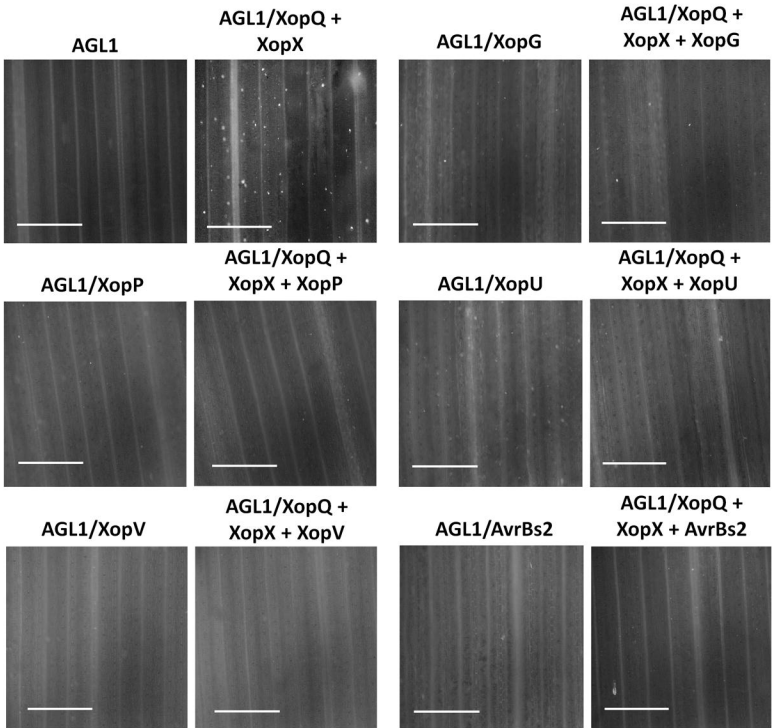**C**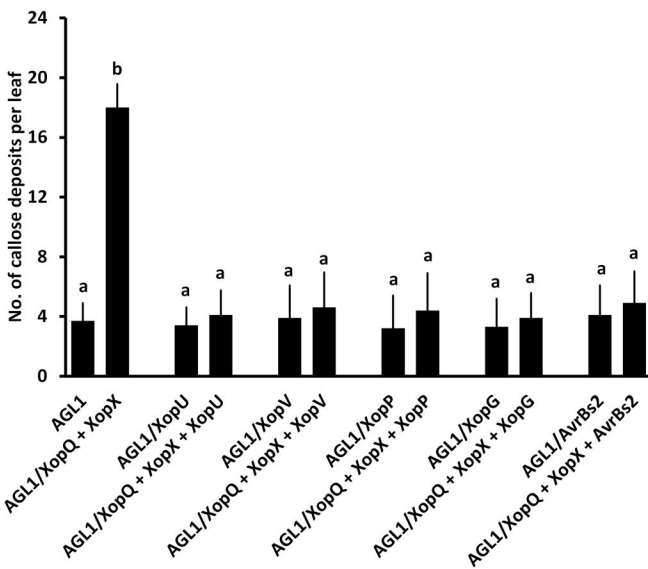

Source: https://www.biorxiv.org/content/biorxiv/early/2020/02/07/2020.02.07.938365.full.pdf
